# Supplementary material
Source: PubMed Central journal article supplement (PMC6783322)
Supplement: NIHMS1023119-supplement-Supp_figS16.pdf [file NIHMS1023119-supplement-Supp_figS16.pdf]

## Supporting Fig. S16

**A**
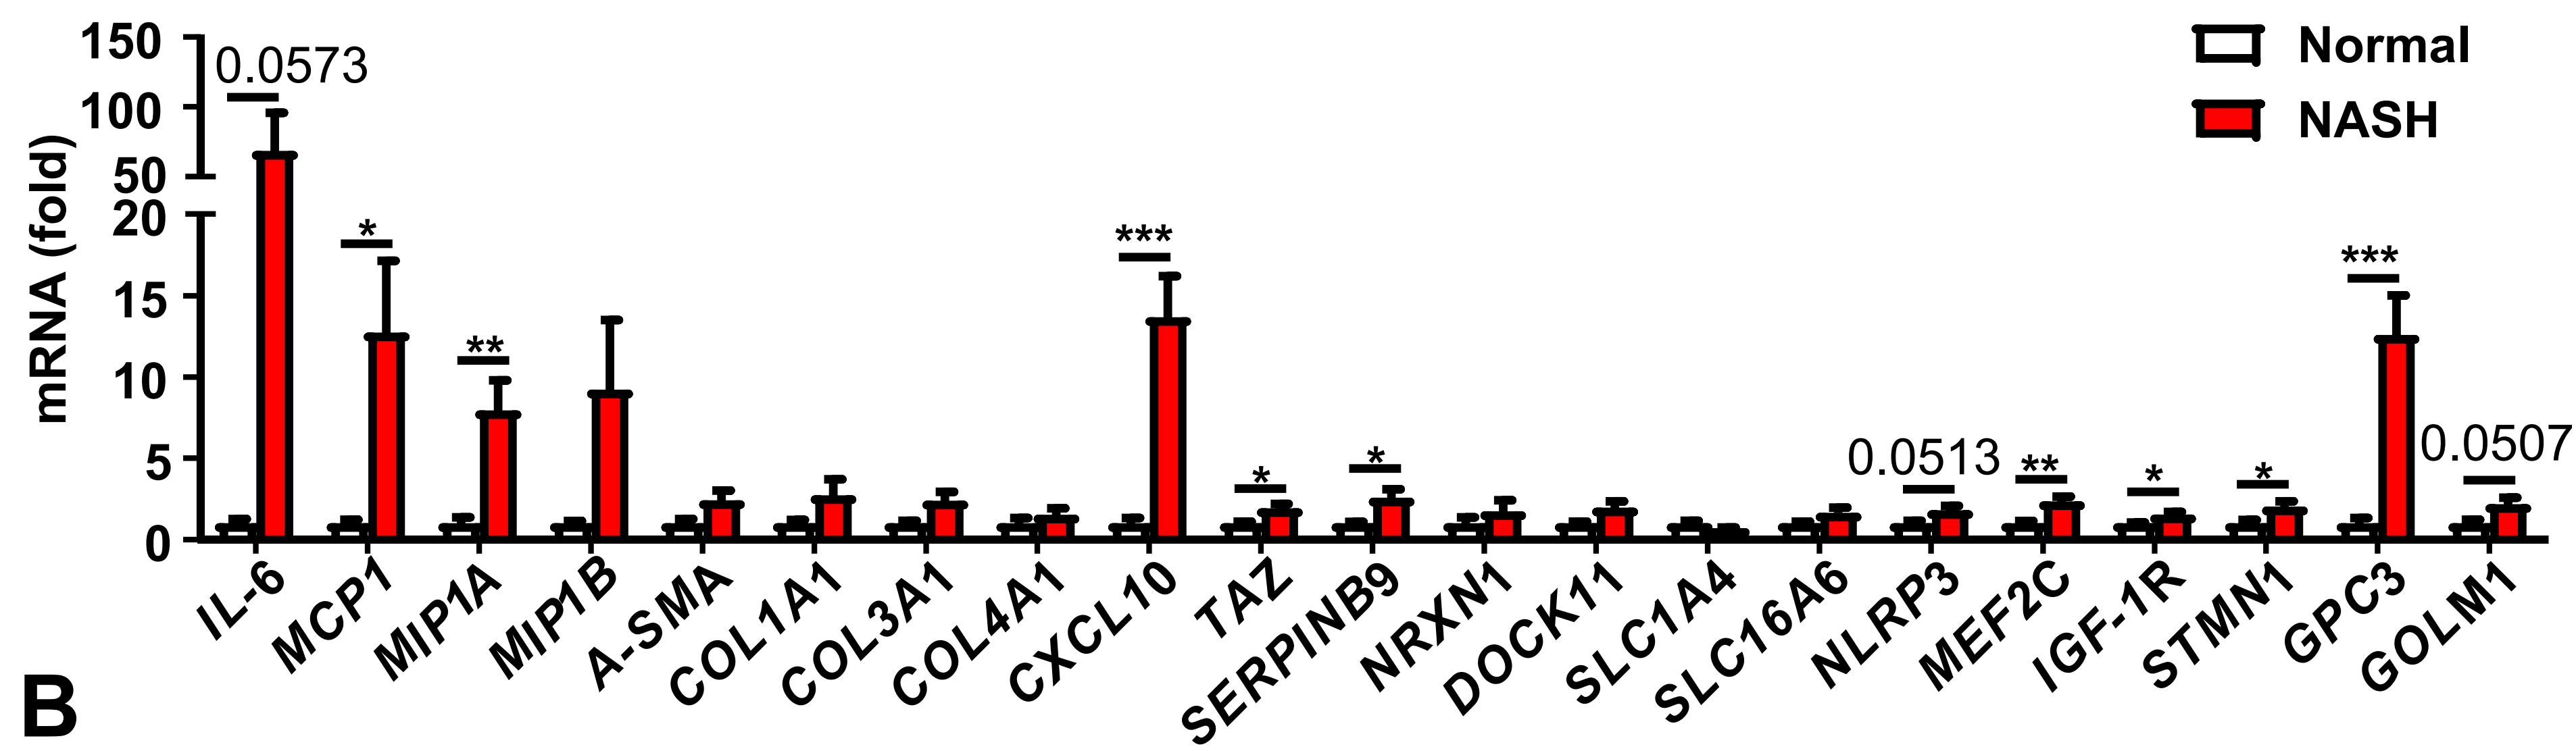
**B**
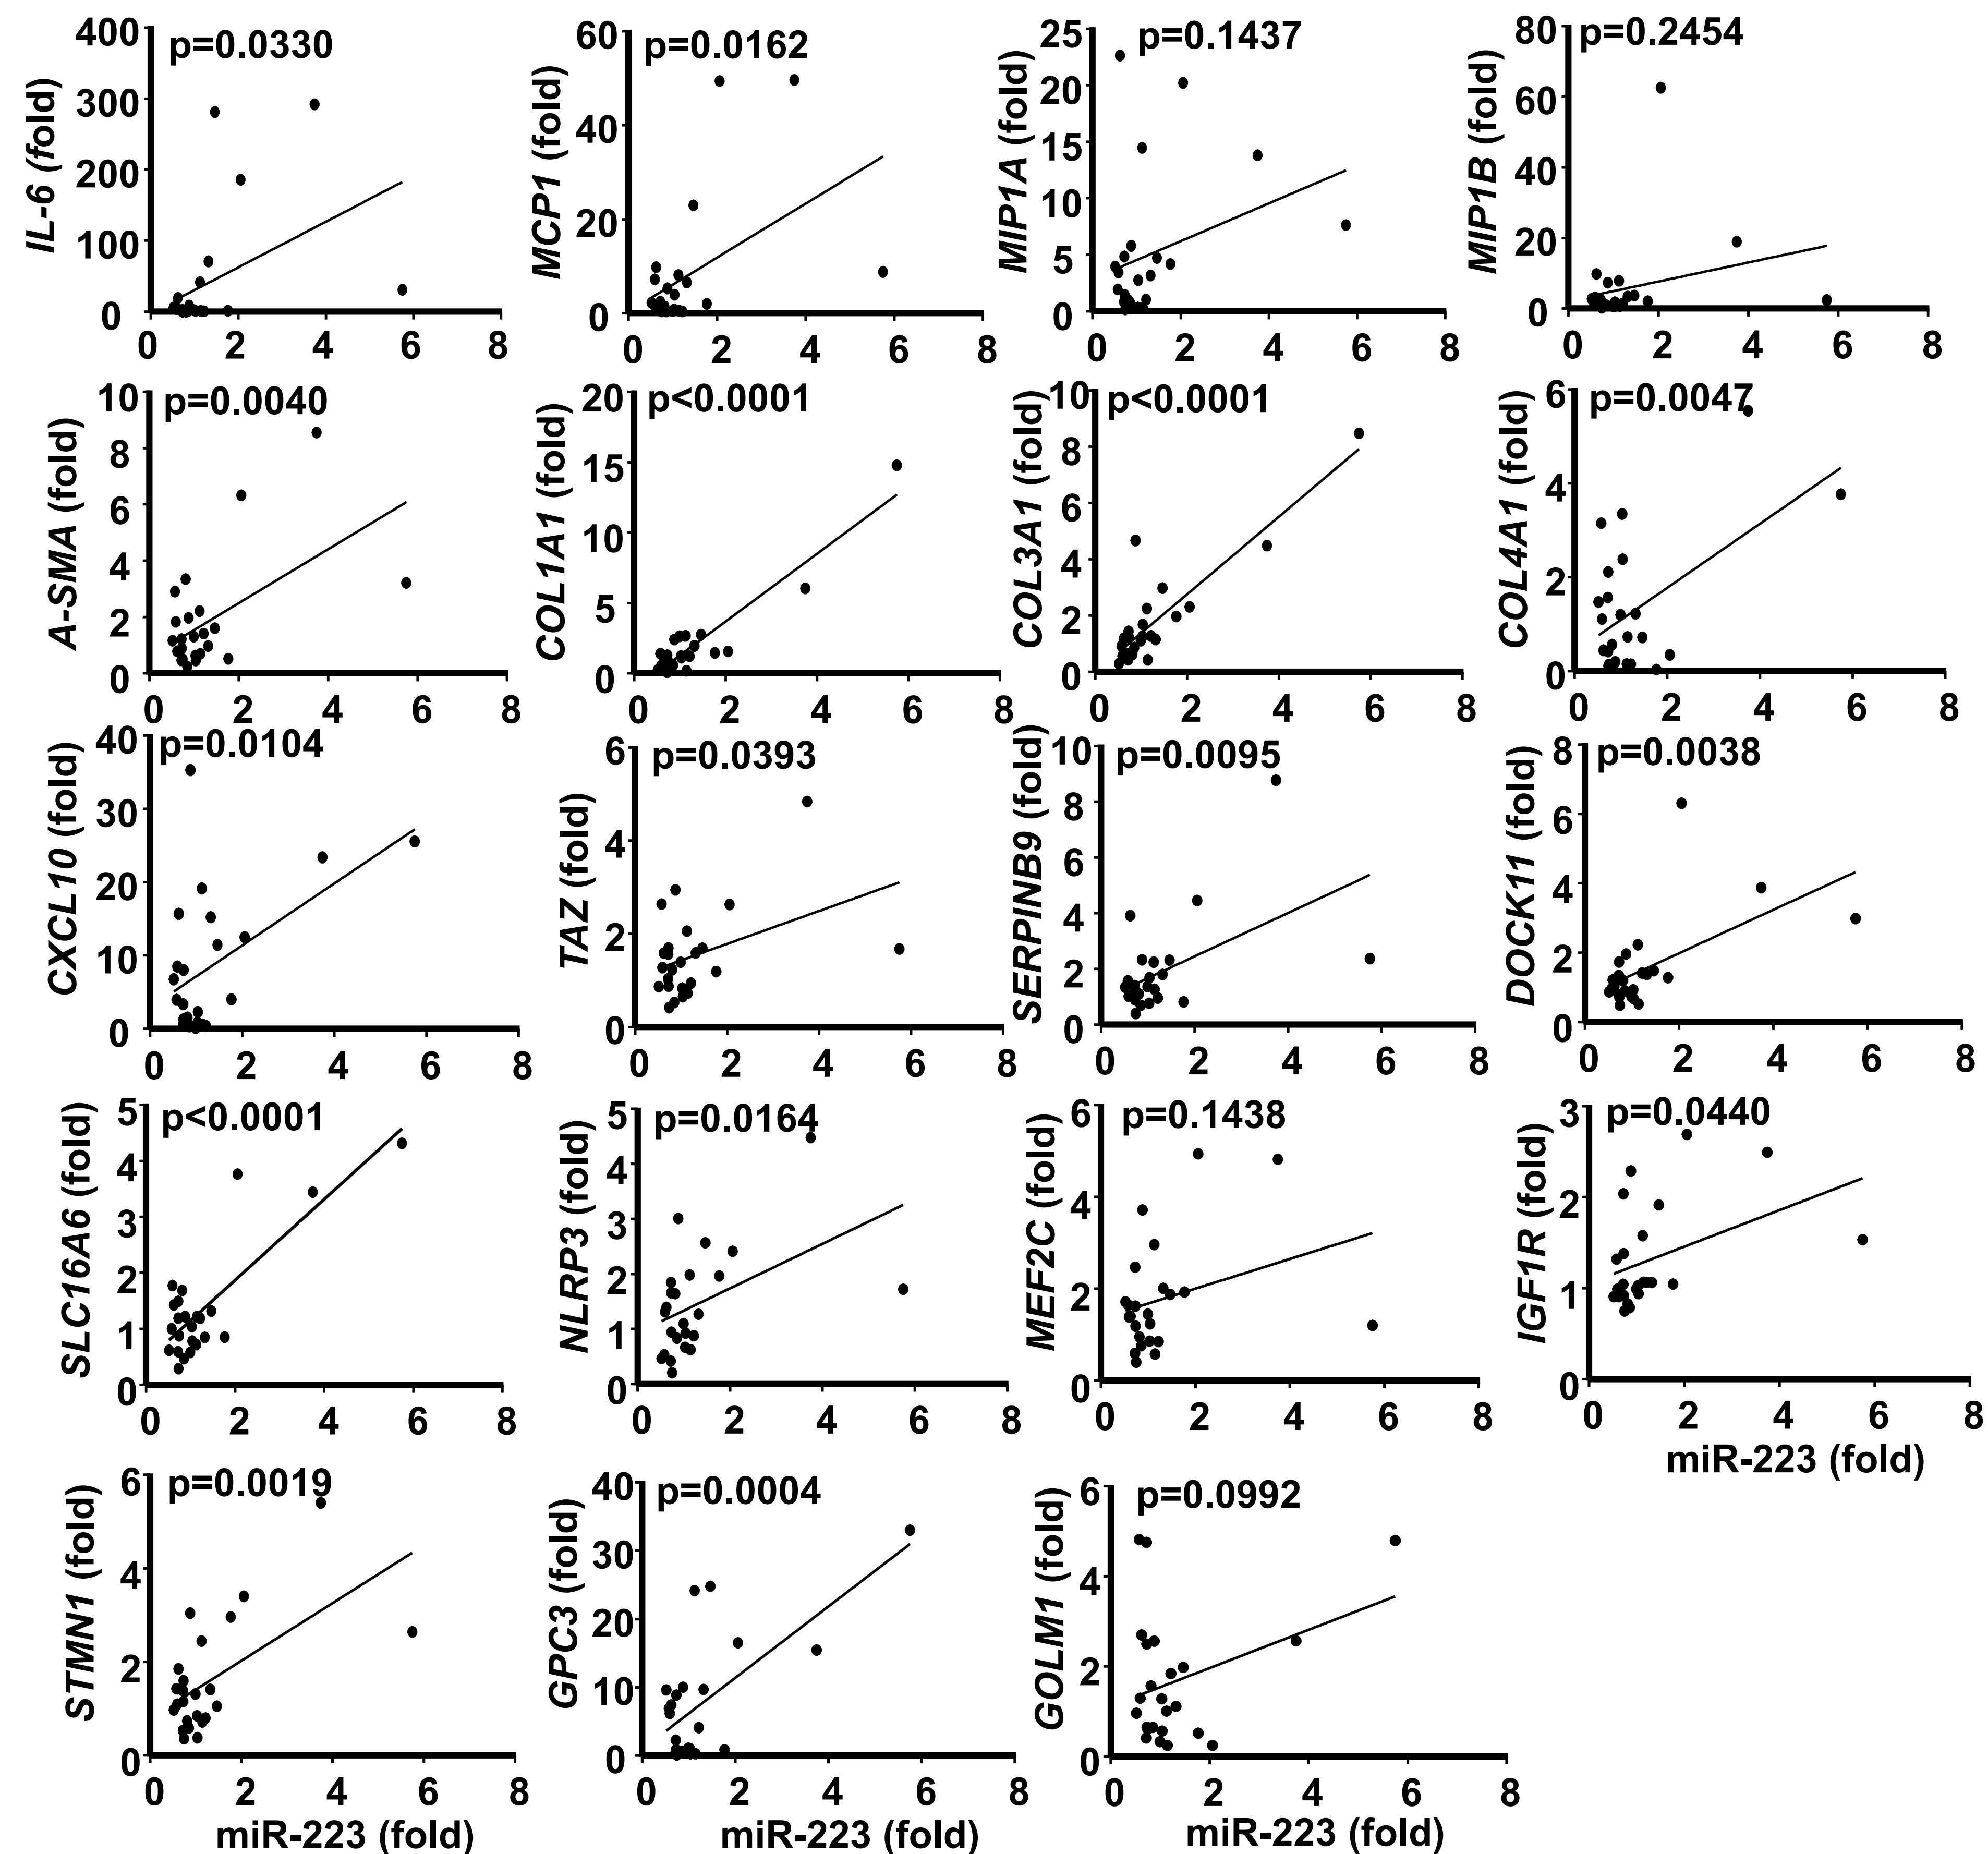

Supporting Fig. S16. Several cytokine genes, chemokine genes, fibrogenesis genes, and potential and proven miR-223 targeted genes positively correlate with miR-223 levels in NASH patients. (A) RT-qPCR analysis of gene expression in the livers of normal (n=10) and NASH (n=14) patients. Values represent means  $\pm$  SEM. \* $P$  < 0.05, \*\* $P$  < 0.01, \*\*\* $P$  < 0.001. (B) Several genes positively correlate with miR-223 in NASH patients. P value is indicated.
