# Supplementary material
Source: PubMed Central journal article supplement (PMC6783322)
Supplement: NIHMS1023119-supplement-Supp_info.pdf [file NIHMS1023119-supplement-Supp_info.pdf]

## ***Supporting Materials***

### **MicroRNA-223 ameliorates nonalcoholic steatohepatitis and cancer by targeting multiple inflammatory and oncogenic genes in hepatocytes**

Yong He, Seonghwan Hwang, Yan Cai, Seung-Jin Kim, Mingjiang Xu, Dingcheng Yang,  
Adrien Guillot, Dechun Feng, Wonhyo Seo, Xin Hou, Bin Gao\*

Laboratory of Liver Diseases, National Institute on Alcohol Abuse and Alcoholism,  
National Institutes of Health, Bethesda, MD, 20892, USA

### ***Methods and Materials***

***Biochemical assays and Complete blood count (CBC) test:*** Serum alanine aminotransferase (ALT) levels were determined using a Catalyst Dx Chemistry Analyzer (IDEXX Laboratories, Westbrook, ME). Mouse anticoagulated blood was collected from mice. CBC test was performed with Hemavet 950 FS Hematology Analyzer (Drew Scientific, Dallas, TX)

***Tissue processing, Histological analysis, and immunohistochemistry:*** Formalin-fixed liver samples were processed, and 4- $\mu\text{m}$ -thick paraffin sections were stained with hematoxylin and eosin (H&E) for histological analysis or Sirius Red (collagen/fibrosis) dyes or Masson's trichrome using Masson Trichrome stain kit (sigma, St. Louis, MO). Frozen liver tissues were cryostat sectioned at 10  $\mu\text{m}$  thick and stained with Oil Red O (neutral lipid stain). For immunohistochemistry, after heat-induced epitope retrieval, paraffin-embedded sections were incubated in 3%  $\text{H}_2\text{O}_2$ , and blocked by another 60 mins in 3% normal serum buffer. Sections were incubated with primary antibodies overnight at 4°C. Vectastain Elite ABC Staining Kit and DAB Peroxidase Substrate Kit (Vector

Laboratories, Inc., Burlingame, CA) were used to visualize the staining according to the manufacturer's instructions. Primary antibodies used were listed below: anti-myeloperoxidase (MPO) antibody (Biocare Medical, LLC, Concord, CA), anti-malonaldehyde (MDA) (Genox, Baltimore, MD), 4-hydroxynonenal (4-HNE) (Genox, Baltimore, MD), anti-F4/80 antibody (Cell Signaling Technology, US), anti-CXCL10 antibody (Abcam, Cambridge, MA), anti-CD3 antibody (Novus Biologicals, CO) anti-TAZ antibody (Sigma-Aldrich). The images were taken with an Olympus camera DP72. The positive cells and in 10 randomly selected high-power fields were calculated and analyzed. The percentage of positive area was determined with ImageJ software (National Institutes of Health, Bethesda, MD).

### ***Microarray analyses of mouse liver samples***

Total RNAs were isolated from liver tissues of 3-month HFD-fed WT and miR-223KO mice. For each sample, 10 µg total RNA was used for complementary DNA (cDNA) synthesis (SuperScript Double-Stranded cDNA Synthesis Kit; Thermo Fisher Scientific, Inc, Waltham, MA) and coupled with dye. A MiniElute polymerase chain reaction (PCR) purification kit (Qiagen, Germantown, MD) was used to purify dye-coupled cDNAs. The cDNA then was hybridized to an Agilent 44K mouse 60-meroligo microarray (Agilent Technologies, Santa Clara, CA). The data were analyzed with the Genespring GX software package (Agilent Technologies). Ingenuity Pathway Analysis was used to process 5 interactive Venn diagrams and gene function analyses. Full microarray data have been uploaded to NCBI's Gene Expression Omnibus.

### ***Isolation and culture of mouse primary hepatocytes and hepatic stellate cells***

**(HSCs):** For hepatocyte and HSC isolation, mice were anesthetized with 30 mg/kg pentobarbital sodium intraperitoneally. Portal vein was cannulated and perfused with Ethylene glycol tetraacetic acid (EGTA) and digested with 0.075% collagenase as described previously.(1) Primary hepatocytes were collected after centrifugation at 400g for 5 min. The mouse hepatocytes were cultured in Dulbecco's modified Eagle's medium (DMEM) containing 10% fetal calf serum and 2 mmol/L penicillin streptomycin.

For HSC isolation, after removing the hepatocytes as described above, the supernatant was transferred to a new tube and recentrifuged at 400g for 10 min at 4°C. The cell pellet was then resuspended in 5 ml of 15%OptiPrep, and loaded carefully with 5 ml of 11.5%OptiPrep, and centrifuged at 1400g for 17 min at 4°C. The cell fraction in the GBSS and 11.5%OptiPrep interphase was gently aspirated, mixed with GBSS. The final cell pellet was collected after centrifuging at 1400g for 10 min at 4°C. The mouse HSCs were cultured in Dulbecco's modified Eagle's medium (DMEM) containing 10% fetal calf serum and 2 mmol/L penicillin streptomycin for 1 day and 5 days.

**Total RNA isolation and real-time quantitative PCR (RT-qPCR):** Total RNA was purified from liver tissues or cell samples using TRIzol reagents (Invitrogen, Carlsbad, CA) according to the manufacturer's instructions. One microgram of RNA was reverse-transcribed into cDNA using a High-capacity cDNA Reverse Transcription kit (Invitrogen, Carlsbad, CA). The expression levels of mRNA were measured by RT-qPCR with an ABI7500 real-time PCR detection system (Applied Biosystems, Foster City, CA). The mRNA levels of 18s or  $\beta$ -actin were used as an internal control. Each test was done in triple replication and the  $2^{-\Delta\Delta Ct}$  method was used to calculate the expression of mRNA. The primers used for real-time PCR are listed in Supporting Table S2.

For miRNA detection, total RNA was isolated from liver tissues and neutrophils by using TRIzol reagents (Invitrogen, Carlsbad, CA), and then the mature miRNA strand cDNA was synthesized using TaqMan® MicroRNA Reverse Transcription Kit (Invitrogen, Carlsbad, CA) according to the manufacturer's instructions. MiRNA was amplified by using TaqMan® MicroRNA Assays (Invitrogen) and TaqMan® Universal PCR Master Mix (Invitrogen) according to the manufacturer's instructions. The fold-change for miRNA relative to snoRNA202 or spiked-in cel-miR-39 was determined by the formula  $2^{-\Delta\Delta Ct}$ .

### **Luciferase activity assay**

The AML12 cells were cultured in 48-well plates 24h prior to transfection, and then cotransfected with 250 ng Control luciferase vector or CXCL10 and TAZ 3'-UTR luciferase vector plasmid (GeneCopoeia, USA) by using Lipofectamine™ 3000 (Invitrogen), 20 nM miR-223 mimics or the negative controls by using Lipofectamine RNAiMAX Reagent

(Invitrogen) according to the manufacturer's instructions. The Firefly and Renilla luciferase activities were measured using the Luc-Pair™ Duo-Luciferase Assay Kit 2.0 (GeneCopoeia, USA) 48h after transfection as described by the manufacturer. The ratio of luminescence from the Firefly luciferase to the Renilla luciferase was calculated as the relative luciferase activity.

### ***Flow cytometry analysis***

Liver tissues were passed through a 70 µm cell strainer in PBS and the cell suspension was centrifuged at 50g for 5 minutes to pellet the hepatocytes. The supernatant enriched liver leukocytes were centrifuged at 1600 rpm for 10 minutes. The pellet was resuspended in 15 ml of 40% Percoll (GE Healthcare, Pittsburgh, PA) and centrifuged at 2400 rpm for 15 minutes. The resulting pellet containing leukocytes was resuspended in 2 ml of ACK lysing buffer (BioWhittaker, Walkersville, MD). Cells were then stained with antibodies of interest for 30 minutes at 4°C in the dark. The following antibodies were used: anti-CD45 (BD Biosciences), anti-CD3 (BD Biosciences), anti-CD19 (BD Biosciences), and anti-NK1.1 (BD Biosciences). Flow cytometry analysis was performed using a FACSCalibur (Beckman). Percentage of positive cells in CD45<sup>+</sup> lymphocytes was calculated.

### ***Western blotting***

Liver tissues and cells were homogenized or lysed in RIPA buffer containing a cocktail of protease inhibitors (Santa Cruz, CA) according to the manufacturer's instruction. Protein extracts were loaded onto 12% acrylamide gels (Bio-Rad) and transferred onto nitrocellulose membranes. Protein bands were visualized with ECL-chemiluminescent kit (GE Healthcare, Piscataway, NJ) or enhanced fluorescence. The antibodies (Abs) against COL1α1, COL3α1, Vimentin, p-JNK, JNK, PCNA, CCND1, CCNE1, YAP, TAZ, p-mTOR and mTOR were purchased from Cell Signaling Technology (Danvers, MA). The Abs against β-actin and α-SMA were purchased from Abcam (Cambridge, MA). The Abs against GPC3 and GOLM1 were purchased from Novus Biologicals (Centennial, CO).

### ***CXCL10 ELISA***

The serum levels of mouse CXCL10 were measured by using CXCL10 ELISA kit (Abcam, Cambridge, MA) according to the manufacturer's protocol.

***Cell culture and transient transfection of miR-223 mimics***

Mouse hepatocyte cell line AML12 cells were cultured in a 1:1 mixture of Dulbecco's modified Eagle's medium and Ham's F12 medium with 0.005 mg/ml insulin, 0.005 mg/ml transferrin, 5 ng/ml selenium, and 40 ng/ml dexamethasone, 10% fetal bovine serum. AML12 cells were transfected with nonspecific miRNA mimics (NS-miRNA) and miR-223 mimics (Thermo fisher Scientific) by Lipofectamine RNAiMAX Reagent (Thermo fisher Scientific) according to the manufacturer's instructions at a final concentration of 10 nM for 24h. After 24h, the cells were stimulated with Palmitic acid (PA) (Cayman, Ann Arbor, Michigan) for the indicated time. The PA was conjugated to free fatty acid (FFA)-free bovine serum albumin (BSA, Sigma-Aldrich) by adding FFAs to 10% BSA-Tris buffer (pH 8.0) and shaking over-night at 37°C. The final FFA concentration was 8 mM with the ratio of 5:1 for PA to BSA.

**References:**

1. Chang B, Xu MJ, Zhou Z, Cai Y, Li M, Wang W, Feng D, et al. Short- or long-term high-fat diet feeding plus acute ethanol binge synergistically induce acute liver injury in mice: an important role for CXCL1. *Hepatology* 2015;62:1070-1085.

**Supporting Table S1. The list general characteristics of the normal and NASH human liver samples.**

| <b>Normal</b> |               |            |
|---------------|---------------|------------|
| <b>#</b>      | <b>Gender</b> | <b>Age</b> |
| <b>1</b>      | M             | 46         |
| <b>2</b>      | M             | 64         |
| <b>3</b>      | F             | 49         |
| <b>4</b>      | F             | 62         |
| <b>5</b>      | M             | 48         |
| <b>6</b>      | M             | 29         |
| <b>7</b>      | M             | 24         |
| <b>8</b>      | M             | 48         |
| <b>9</b>      | F             | 63         |
| <b>10</b>     | M             | 28         |

| <b>NASH</b> |               |            |                                                          |
|-------------|---------------|------------|----------------------------------------------------------|
| <b>#</b>    | <b>Gender</b> | <b>Age</b> | <b>Primary Diagnosis</b>                                 |
| <b>1</b>    | M             | 16         | Fatty liver, 50% fat was estimated in the liver          |
| <b>2</b>    | F             | 62         | Fatty liver, cirrhosis                                   |
| <b>3</b>    | F             | 59.2       | Fatty liver, cirrhosis secondary to steatohepatitis      |
| <b>4</b>    | F             | 58.6       | Fatty liver, diagnosed as NASH                           |
| <b>5</b>    | F             | 57.2       | Fatty liver, cirrhosis                                   |
| <b>6</b>    | M             | 62.3       | Fatty liver, secondary to NASH                           |
| <b>7</b>    | F             | 43.5       | Fatty liver, diagnosed as NASH                           |
| <b>8</b>    | F             | 55.3       | Fatty liver, secondary to NASH, cirrhosis                |
| <b>9</b>    | F             | 62         | Fatty liver, NASH                                        |
| <b>10</b>   | F             | 48.3       | Fatty liver, cirrhosis                                   |
| <b>11</b>   | F             | 67.6       | Cryptogenic Cirrhosis/ NASH                              |
| <b>12</b>   | F             | 63         | NASH – fatty, Cirrhosis secondary to NASH                |
| <b>13</b>   | M             | 68.5       | Cirrhosis secondary to NASH, HCC/ NASH - no longer fatty |
| <b>14</b>   | F             | 58.7       | NASH, cirrhosis.                                         |

**Supporting Table S2: RT-qPCR primer sequences**

| <b>Genes (mouse)</b> | <b>Forward primer (5'–3')</b> | <b>Reverse primer (5'–3')</b> |
|----------------------|-------------------------------|-------------------------------|
| <i>Tnfa</i>          | AGGCTGCCCCGACTACGT            | GACTTTCTCCTGGTATGAGATAGCAAA   |
| <i>Il6</i>           | TCCATCCAGTTGCCTTCTTG          | TTCCACGATTTCCAGAGAAC          |
| <i>Il10</i>          | CCAAGCCTTATCGGAAATGA          | TTTTACAGGGGAGAAATCG           |
| <i>Ly6g</i>          | TGCGTTGCTCTGGAGATAGA          | CAGAGTAGTGGGCAGATGG           |
| <i>F4/80</i>         | GGAAAGCACCATGTTAGCTGC         | CCTCTGGCTGCCAAGTTAATG         |
| <i>Mcp1</i>          | CCAGCCTACTCATTGGGAT           | GGCCTGCTGTTACAGTT             |
| <i>Mip1α</i>         | TGAGAGTCTTGGAGGCAGCGA         | TGTGGCTACTTGGCAGCAAACA        |
| <i>Mip1β</i>         | AACACCATGAAGCTCTGCGT          | AGAAACAGCAGGAAGTGGGA          |
| <i>Mip2</i>          | TCCAGGTCAGTTAGCCTTGC          | CGGTCAAAAAGTTTGCCTTG          |
| <i>Icam-1</i>        | CAATTTCTCATGCCGCACAG          | AGCTGGAAGATCGAAAGTCCG         |
| <i>Srebp1c</i>       | GGCTCTGGAACAGACACTGG          | TGTTGTTGATGAGCTGGAG           |
| <i>Scd-1</i>         | TTCTTGGGATACACTCTGGTGC        | CGGGATTGAATGTTCTTGTCTG        |
| <i>Acc-1</i>         | GATGAACCATCTCCGTTGGC          | GACCCAATTATGAATCGGGAGTG       |
| <i>Cidea</i>         | TCTGCAATCCCATGAATGTC          | CAGTGATTTAAGAGACGCGG          |
| <i>Cideb</i>         | ACGTAGCAGCAAGGTCTCCA          | GACCCCTCCGTGTCTGTGAT          |
| <i>Fas</i>           | GGAGGTGGTGATAGCCGGTAT         | TGGGTAATCCATAGAGCCCAG         |
| <i>Cpt-1</i>         | GCACACCAGGCAGTAGCTTT          | CAGGAGTTGATTCCAGACAGGTA       |
| <i>Ppary</i>         | GATGCACTGCCTATGAGCAC          | TCTTCCATCACGGAGAGGTC          |
| <i>α-sma</i>         | TCCTGACGCTGAAGTATCCGATA       | GGTGCCAGATCTTTTCCATGTC        |
| <i>Col1α1</i>        | TAGGCCATTGTGTATGCAGC          | ACATGTTCCAGCTTTGTGGACC        |
| <i>Col1α2</i>        | GGTGAGCCTGGTCAAACGG           | ACTGTGTCCTTTCACGCCTTT         |
| <i>Col3a1</i>        | TAGGACTGACCAAGGTGGCT          | GGAACCTGGTTTCTTCTCACC         |
| <i>Mmp-13</i>        | C11TGGCTTAGAGGTGACTGG         | AGGCACTCCACATCTTGGTTT         |
| <i>Vimentin</i>      | TCCACTTCCGTTCAAGGTC           | AGAGAGAGGAAGCCGAAAGC          |
| <i>Cxcl9</i>         | CGATCCACTACAAATCCCTCA         | TAGGCAGTTTTGATCTCCGT          |
| <i>Cxcl10</i>        | CTCATCCTGCTGGGTCTGAG          | CCTATGGCCCTCATTCTCAC          |
| <i>Cxcl11</i>        | CCACAGCTGCTCAAGGCTTC          | AACTTTGTGCGAGCCGTTAC          |
| <i>Cxcr3</i>         | TCTCGTTTTCCCATAATCG           | AGCCAAGCCATGTACCTTGA          |
| <i>Pcna</i>          | GGAGACAGTGGAGTGGCTTT          | TGGATAAAGAAGAGGAGGCG          |
| <i>Ki67</i>          | GACAGCTTCCAAAGCTCACC          | TGTGTCTTAGCTGCCTCCT           |
| <i>Afp</i>           | CAGCAGCCTGAGAGTCCATA          | GGCGATGGGTGTTTAGAAAG          |
| <i>Gpc3</i>          | TGGTGTAGTCTTGGCATGG           | TGCTCCAGTCTGCGAGTATG          |
| <i>Golm</i>          | GCAGGTCTCGAATGAGCTTC          | CCAGTCTAGCCACAGCTTCC          |
| <i>Ccnb1</i>         | GGCTTGGAGAGGGATTATCA          | ACCAGAGGTGGAACCTTGCTG         |
| <i>Ccnb2</i>         | CAGAGAAAAGCTTGGCAGAGG         | TGAAACCAGTGCAGATGGAG          |
| <i>Ccnd1</i>         | GCGTACCCTGACACCAATCTC         | CTCCTCTTCGCACTTCTGCTC         |
| <i>Ccne1</i>         | TCCACGCATGCTGAATTATC          | TTGCAAGACCCAGATGAAGA          |
| <i>Serpinb9</i>      | GACACATCATCTGCACTGGC          | AAGGAAAGTGGCATCAACCA          |
| <i>Nrxn1</i>         | AGTCACAGCTGAAGCCATCC          | ATGGGCAAATTGAGAGAGGA          |
| <i>Slc1a4</i>        | GCAACCACAAGATTGGAAGG          | CTGGAGAACTCAGGGCCTC           |
| <i>Slc16a6</i>       | CTCCATCAGGCACTTGGGTA          | GGTGCCTTTTGGGGTTTATT          |
| <i>Dock11</i>        | GCCATTGGCAAGTTTCCAGAG         | GGATCCTAAGGTTCTTGCTGA         |
| <i>Wwtr1/Taz</i>     | CATGGCGGAAAAAGATCCTCC         | GTCGGTCACGTCATAGGACTG         |
| <i>Keratin 8</i>     | GAGGAGAGCAGGCTGGAGTC          | GCTTCCCATCTCGGGTTTCA          |
| <i>Keratin 18</i>    | CCTCAATCTGCTGAGACCAGTA        | CTGTGGAGAGCCACATCCAT          |
| <i>18s</i>           | AACTTTCGATGGTAGTCGCCGT        | TCCTTGGATGTGGTAGCCGTTT        |

| <b>Genes (human)</b> | <b>Forward primer (5'-3')</b> | <b>Reverse primer (5'-3')</b> |
|----------------------|-------------------------------|-------------------------------|
| <i>IL6</i>           | GTCAGGGGTGGTTTATTGCA          | AGTGAGGAACAAGCCAGAGC          |
| <i>MCP1</i>          | AGGTGACTGGGGCATTGAT           | GCCTCCAGCATGAAAGTCTC          |
| <i>MIP1A</i>         | TGAAATTCTGTGGAATCTGCC         | GGCTCTCTGCAACCAGTTCT          |
| <i>MIP1β</i>         | GCTTGCTTCTTTTGGTTTGG          | CTTTTCTTACACCGCGAGGA          |
| <i>A-SMA</i>         | GTGACGAAGCACAGAGCAAA          | CTTTTCCATGTCGTCCCAGT          |
| <i>COL1A1</i>        | CAGATCACGTCATCGCACAA          | TGTGAGGCCACGCATGAG            |
| <i>COL3A1</i>        | AGGACTGACCAAGATGGGAA          | AGGGGAGCTGGCTACTTCTC          |
| <i>COL4A1</i>        | CCTTTTGTCCCTTCACTCCA          | CTCCACGAGGAGCACAGC            |
| <i>CXCL10</i>        | GAATCGAAGGCCATCAAGAA          | CCTCTGTGTGGTCCATCCTT          |
| <i>WWTR1/TAZ</i>     | TCCCAGCCAAATCTCGTGATG         | AGCGCATTGGGCATACTCAT          |
| <i>SERPINB9</i>      | GTTGTTGCCGGGTAGCTCAAT         | CAAACGGTTCATTCCACTTTCC        |
| <i>NRXN1</i>         | TAAGTGGCCTCCTAATGACCG         | TCGCACCAATACGGCTTCTTT         |
| <i>DOCK11</i>        | ACACTGTGCAGAACCCTATATCA       | ACACTTGTTTAGCTGTCCTGTG        |
| <i>SLC1A4</i>        | CAGCGACCCTTCCCTCTATGA         | GCCCCGATGGGGAGAATAAAC         |
| <i>SLC16A6</i>       | TTGGCAAAAGACGTTCCATAGT        | CTGGTGCGAAAGCAAACACA          |
| <i>NLRP3</i>         | GATCTTCGCTGCGATCAACAG         | CGTGCATTATCTGAACCCAC          |
| <i>MEF2C</i>         | CTGGTGTAACACATCGACCTC         | GATTGCCATACCCGTTCCCT          |
| <i>IGF1R</i>         | AGGATATTGGGCTTTACAACCTG       | GAGGTAACAGAGGTCAGCATTTT       |
| <i>STMN1</i>         | TCAGCCCTCGGTCAAAAGAAT         | TTCTCGTGCTCTCGTTTCTCA         |
| <i>GPC3</i>          | ATTGGCAAGTTATGTGCCAT          | TTCGGCTGGATAAGGTTTCTTC        |
| <i>GOLM1</i>         | GTGTGAGGAGCGAATAGAAGAGG       | GTCTCTGGTCGTTGTTTTCACT        |
| <i>18S</i>           | GGCCCTGTAATTGGAATGAGTC        | CCAAGATCCAACACTACGAGCTT       |



## Supporting Table S3: Ingenuity Pathway Analysis of HFD-fed WT and miR-223KO microarray data

### INGENUITY PATHWAY ANALYSIS

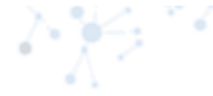

Analysis Name: IPA GENE LIST FC2 685 - 2017-04-19 04:05 PM  
Analysis Creation Date: 2017-04-19  
Build version: 439932M  
Content version: 33559992 (Release Date: 2017-03-28)

#### Analysis Settings

Reference set: Whole Mouse Genome Microarray 4x44K v2  
Relationship to include: Direct and Indirect  
Includes Endogenous Chemicals  
Optional Analyses: My Pathways My List

#### Filter Summary:

Consider only relationships where  
confidence = Experimentally Observed

**Top Canonical Pathways**

| Name                            | p-value  | Overlap     |
|---------------------------------|----------|-------------|
| B Cell Development              | 3.43E-03 | 16.7 % 4/24 |
| Semaphorin Signaling in Neurons | 1.12E-02 | 9.8 % 5/51  |
| Allograft Rejection Signaling   | 2.49E-02 | 9.5 % 4/42  |
| Alanine Biosynthesis III        | 2.66E-02 | 100.0 % 1/1 |
| Rac Signaling                   | 3.38E-02 | 6.1 % 7/115 |

**Top Upstream Regulators**

| Upstream Regulator | p-value of overlap | Predicted Activation |
|--------------------|--------------------|----------------------|
| nonylphenol        | 4.32E-05           |                      |
| GPD1               | 1.51E-04           |                      |
| SLC25A13           | 1.65E-04           |                      |
| EOMES              | 2.92E-04           |                      |
| EHMT2              | 3.72E-04           |                      |

**Top Diseases and Bio Functions**

| Diseases and Disorders              |                     |            |
|-------------------------------------|---------------------|------------|
| Name                                | p-value             | #Molecules |
| Cancer                              | 2.66E-02 - 6.67E-05 | 390        |
| Organismal Injury and Abnormalities | 2.66E-02 - 6.67E-05 | 397        |
| Reproductive System Disease         | 2.66E-02 - 6.67E-05 | 179        |
| Inflammatory Response               | 2.66E-02 - 8.57E-05 | 57         |
| Developmental Disorder              | 2.66E-02 - 1.79E-04 | 62         |

**Molecular and Cellular Functions**

Summary of Analysis - IPA GENE LIST FC2 685 - 2017-04-19 04:05 PM

| Name                                   | p-value             | #Molecules |
|----------------------------------------|---------------------|------------|
| Cell-To-Cell Signaling and Interaction | 2.66E-02 - 8.57E-05 | 79         |
| Cell Cycle                             | 2.66E-02 - 6.46E-04 | 20         |
| Cellular Development                   | 2.66E-02 - 7.05E-04 | 68         |
| Cellular Growth and Proliferation      | 2.66E-02 - 7.05E-04 | 66         |
| Molecular Transport                    | 2.66E-02 - 7.05E-04 | 35         |

**Physiological System Development and Function**

| Name                                          | p-value             | #Molecules |
|-----------------------------------------------|---------------------|------------|
| Hematological System Development and Function | 2.66E-02 - 8.57E-05 | 76         |
| Immune Cell Trafficking                       | 2.66E-02 - 8.57E-05 | 52         |
| Digestive System Development and Function     | 2.66E-02 - 1.41E-04 | 18         |
| Embryonic Development                         | 2.66E-02 - 1.41E-04 | 69         |
| Organismal Development                        | 2.66E-02 - 1.41E-04 | 78         |

**Top Tox Functions**

**Assays: Clinical Chemistry and Hematology**

| Name                           | p-value             | #Molecules |
|--------------------------------|---------------------|------------|
| Increased Levels of Albumin    | 9.85E-03 - 9.85E-03 | 2          |
| Decreased Levels of Hematocrit | 2.24E-02 - 2.24E-02 | 2          |
| Increased Levels of Potassium  | 3.68E-01 - 5.24E-02 | 2          |
| Decreased Levels of Albumin    | 1.26E-01 - 1.26E-01 | 1          |
| Decreased Levels of Potassium  | 1.51E-01 - 1.51E-01 | 2          |

**Cardiotoxicity**

Summary of Analysis - IPA GENE LIST FC2 685 - 2017-04-19 04:05 PM

| Name                                   | p-value             | #Molecules |
|----------------------------------------|---------------------|------------|
| Cardiac Arrhythmia                     | 6.00E-01 - 2.66E-02 | 11         |
| Cardiac Dilation                       | 2.48E-01 - 2.66E-02 | 9          |
| Cardiac Hyperplasia/Hyperproliferation | 2.66E-02 - 2.66E-02 | 1          |
| Cardiac Dysfunction                    | 2.96E-01 - 3.74E-02 | 7          |
| Cardiac Enlargement                    | 5.37E-01 - 4.85E-02 | 12         |

**Hepatotoxicity**

| Name                                 | p-value             | #Molecules |
|--------------------------------------|---------------------|------------|
| Liver Hyperplasia/Hyperproliferation | 5.04E-01 - 1.44E-02 | 175        |
| Liver Damage                         | 5.78E-01 - 2.66E-02 | 12         |
| Liver Inflammation/Hepatitis         | 5.89E-01 - 2.66E-02 | 12         |
| Liver Cirrhosis                      | 2.46E-01 - 3.70E-02 | 11         |
| Liver Cholestasis                    | 1.49E-01 - 1.49E-01 | 1          |

**Nephrotoxicity**

| Name                      | p-value             | #Molecules |
|---------------------------|---------------------|------------|
| Renal Damage              | 4.01E-01 - 1.82E-03 | 13         |
| Renal Necrosis/Cell Death | 5.27E-01 - 8.97E-03 | 22         |
| Nephrosis                 | 5.38E-01 - 1.35E-02 | 3          |
| Glomerular Injury         | 1.00E00 - 2.66E-02  | 6          |
| Renal Inflammation        | 5.28E-01 - 2.66E-02 | 7          |

**Top Networks**

| ID | Associated Network Functions                                                                                  | Score |
|----|---------------------------------------------------------------------------------------------------------------|-------|
| 1  | Cancer, Cell Death and Survival, Organismal Injury and Abnormalities                                          | 37    |
| 2  | Cell-To-Cell Signaling and Interaction, Cellular Assembly and Organization, Cellular Function and Maintenance | 37    |

(c) 2000-2017 QIAGEN. All rights reserved.

|   |                                                                                                      |    |
|---|------------------------------------------------------------------------------------------------------|----|
| 3 | Developmental Disorder, Hereditary Disorder, Neurological Disease                                    | 35 |
| 4 | Lipid Metabolism, Small Molecule Biochemistry, Vitamin and Mineral Metabolism                        | 35 |
| 5 | Cellular Assembly and Organization, Nervous System Development and Function, Cell Death and Survival | 35 |

#### Top Tox Lists

| Name                                                                           | p-value  | Overlap      |
|--------------------------------------------------------------------------------|----------|--------------|
| <a href="#">Genes Downregulated in Response to Chronic Renal Failure (Rat)</a> | 1.95E-03 | 30.0 % 3/10  |
| <a href="#">Increases Renal Damage</a>                                         | 6.98E-03 | 8.3 % 7/84   |
| <a href="#">Renal Necrosis/Cell Death</a>                                      | 1.86E-02 | 4.3 % 22/511 |
| <a href="#">Reversible Glomerulonephritis Biomarker Panel (Rat)</a>            | 2.23E-02 | 13.0 % 3/23  |
| <a href="#">Cytochrome P450 Panel - Substrate is a Xenobiotic (Mouse)</a>      | 2.49E-02 | 12.5 % 3/24  |

#### Top Analysis-Ready Molecules

##### Expr Fold Change up-regulated

| Molecules                      | Expr. Value | Expr. Chart |
|--------------------------------|-------------|-------------|
| <a href="#">CTSE</a>           | ↑ 8.737     |             |
| <a href="#">Ren2</a>           | ↑ 6.619     |             |
| <a href="#">REN*</a>           | ↑ 6.028     |             |
| <a href="#">BC057193</a>       | ↑ 4.389     |             |
| <a href="#">HSPA1A/HSPA1B*</a> | ↑ 4.145     |             |
| <a href="#">DYNLT1</a>         | ↑ 4.126     |             |
| <a href="#">SYBU</a>           | ↑ 3.939     |             |
| <a href="#">TMEM209</a>        | ↑ 3.771     |             |
| <a href="#">LRRC39</a>         | ↑ 3.731     |             |
| <a href="#">PIP4K2A</a>        | ↑ 3.654     |             |

##### Expr Fold Change down-regulated

| Molecules                | Expr. Value | Expr. Chart |
|--------------------------|-------------|-------------|
| Hsd3b4 (includes others) | ↓ -8.154    |             |
| BRD8                     | ↓ -5.089    |             |
| Slco1a1*                 | ↓ -4.796    |             |
| CRMP1                    | ↓ -4.478    |             |
| GP9                      | ↓ -4.402    |             |
| POP4                     | ↓ -3.938    |             |
| KCNJ3                    | ↓ -3.855    |             |
| UNC13A                   | ↓ -3.765    |             |
| GJA3                     | ↓ -3.724    |             |
| USP53                    | ↓ -3.618    |             |

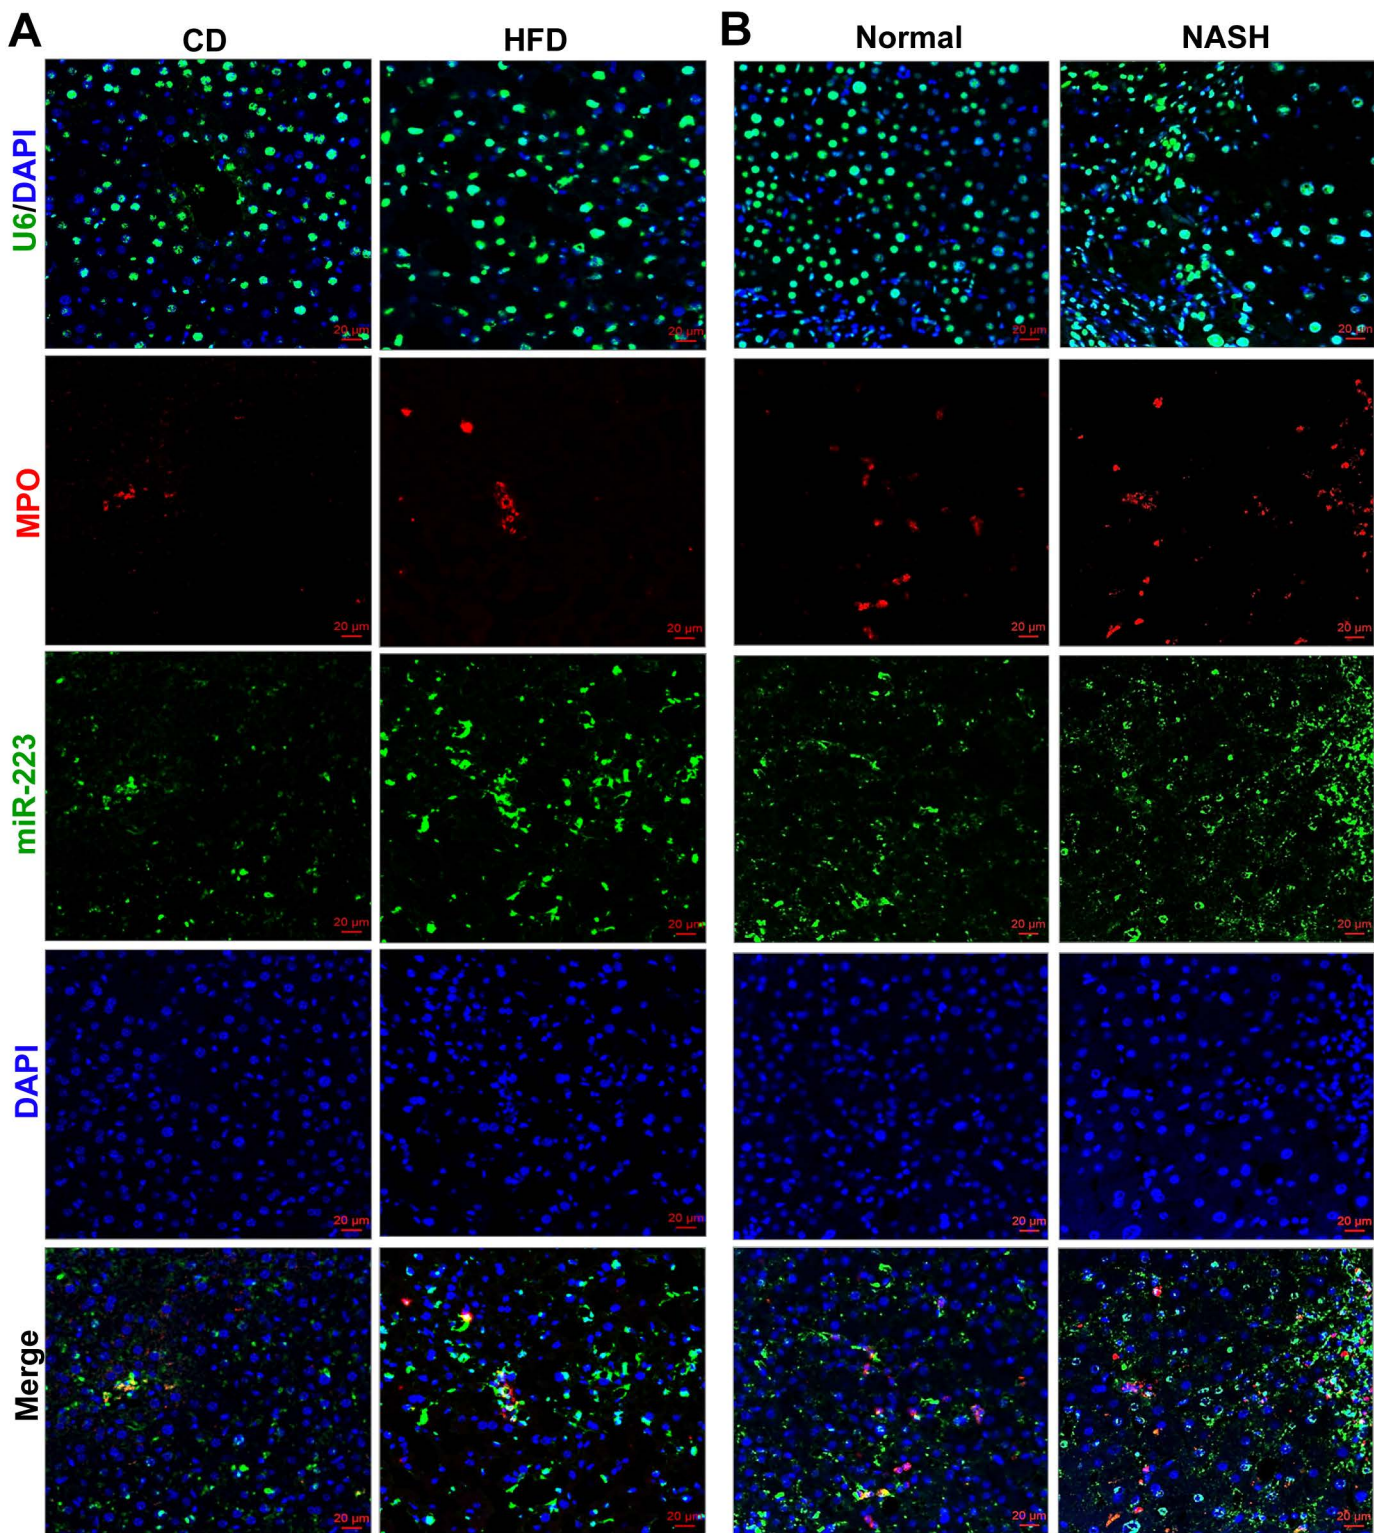

**Supporting Fig. S1. miR-223 is highly elevated in the liver from HFD-fed mice and human NASH patients.** Liver tissue sections from 3-month CD or HFD-fed mice, or from normal or NASH human livers were subjected to miR-223 In Situ Hybridization along with immunofluorescence staining of neutrophil marker MPO. Representative images of miR-223 or U6 expression (green), MPO (red) and nuclei (blue) were shown. Mouse liver samples were from the frozen tissues (A), while human liver samples were from formalin-fixed tissues (B).

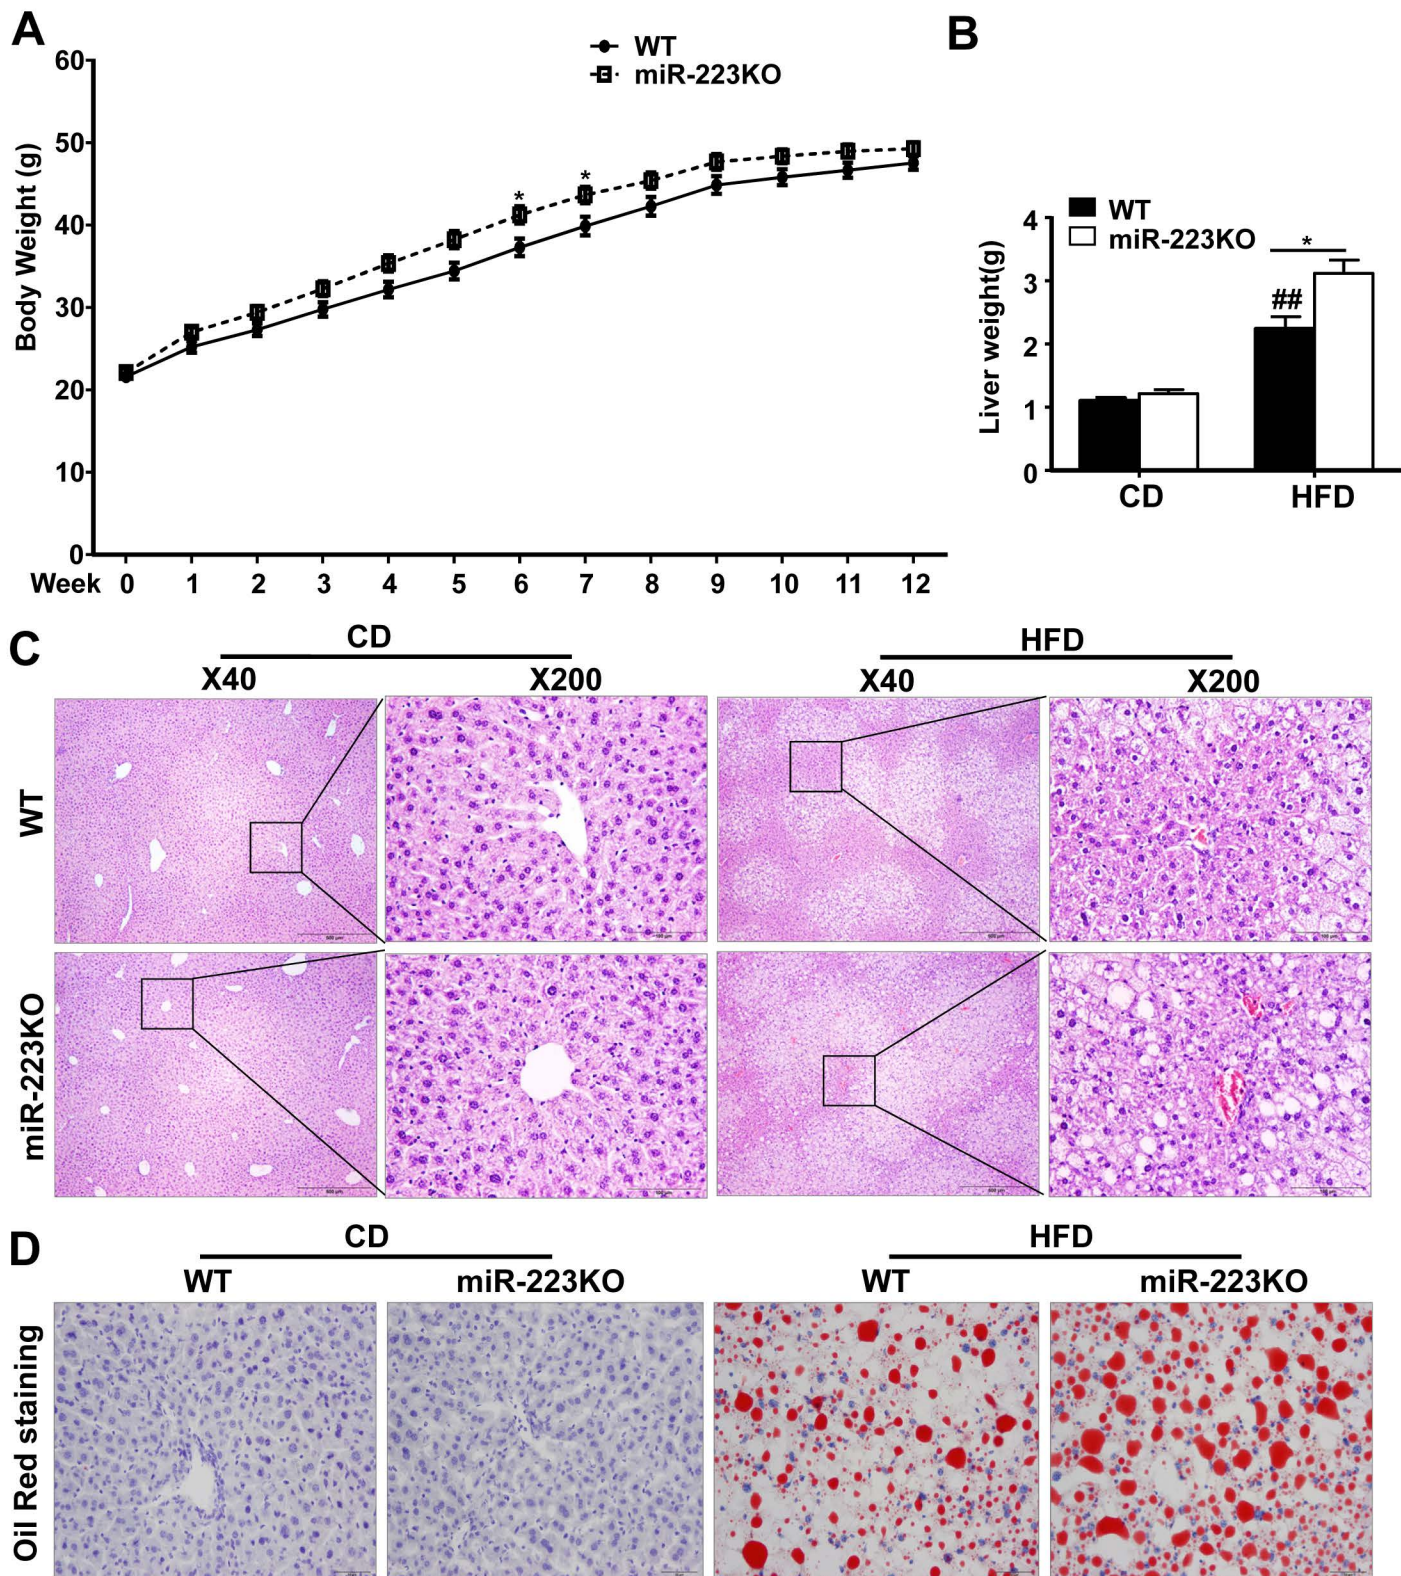

**Supporting Fig. S2. miR-223KO are more susceptible to HFD-induced steatosis.** WT and miR-223KO mice were fed with a HFD or CD for 3 months. Liver tissue samples were collected. (A) The body weight of WT and miR-223KO mice was measured. (B) Liver weight was measured. (C) Representative images of H&E staining of liver tissue sections were shown. (D) Representative images of Oil Red staining of liver tissue sections were shown. Values represent means  $\pm$  SEM (n=5-10). \* $P$ < 0.05 in comparison with WT HFD group; ## $P$ <0.01 in comparison with WT CD group.



# Supporting Fig. S3A-D

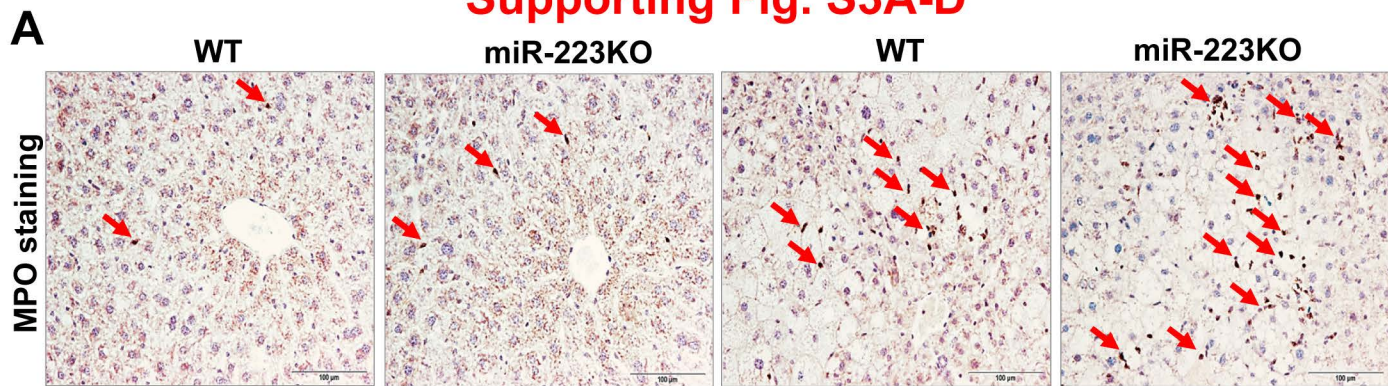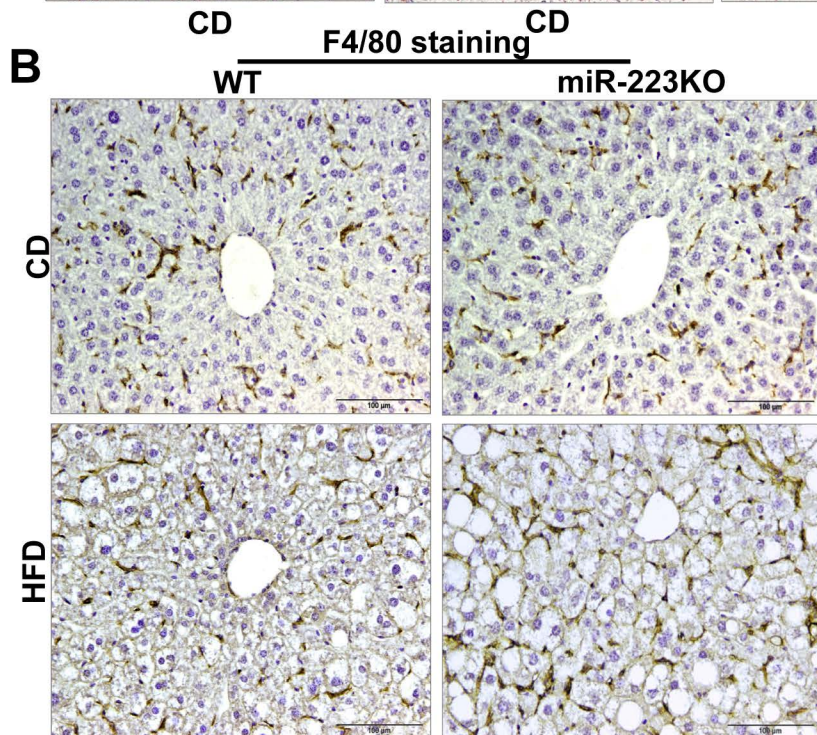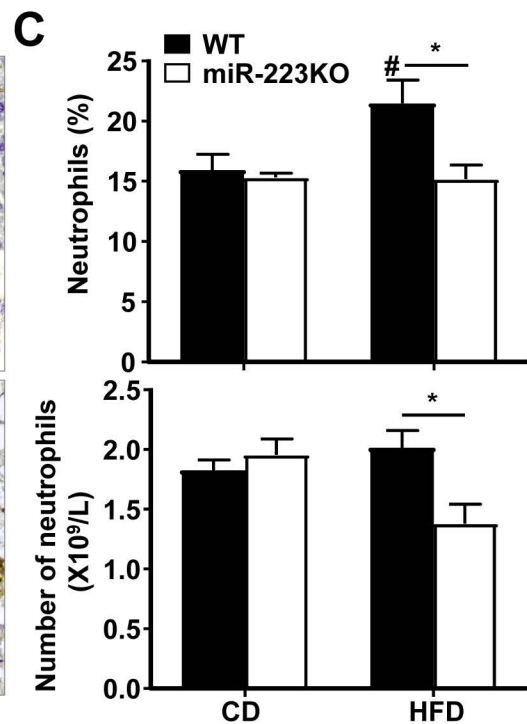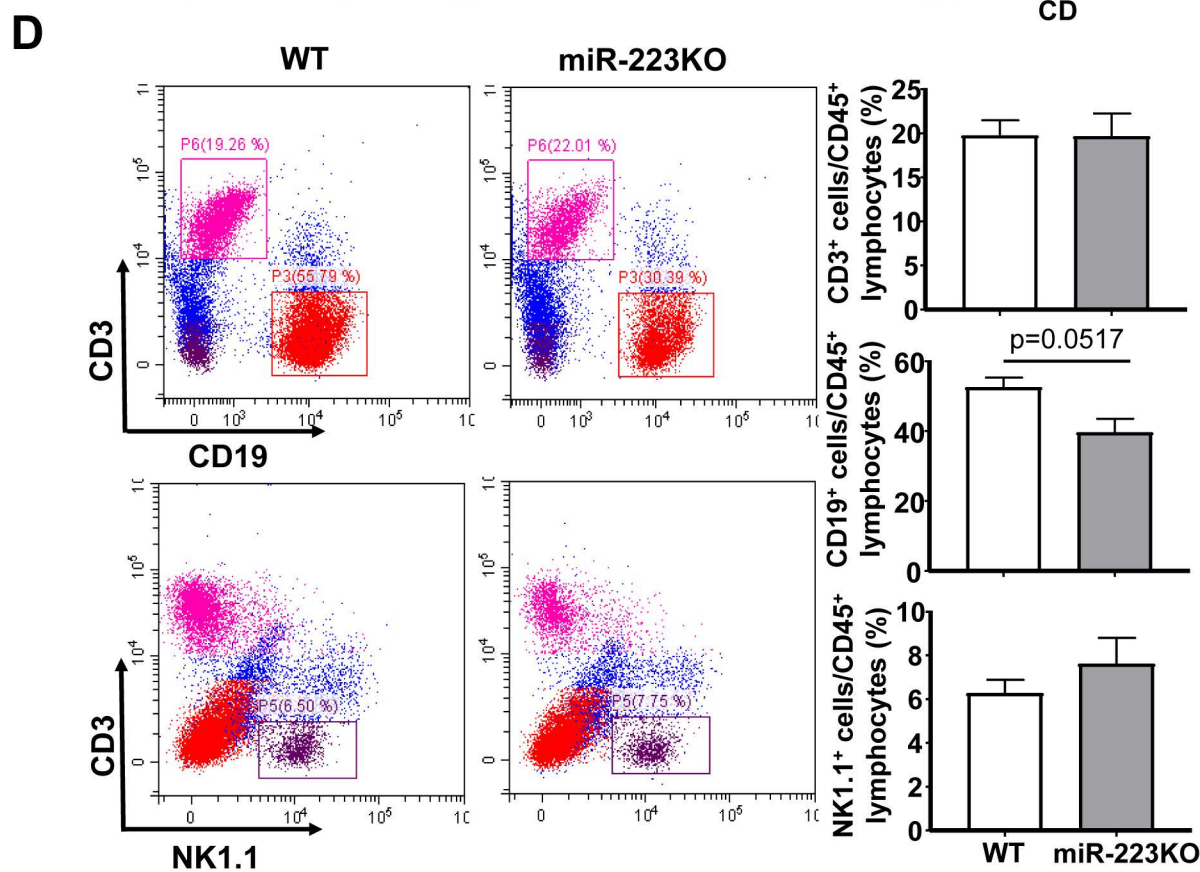

## Supporting Fig. S3E-F

**E**

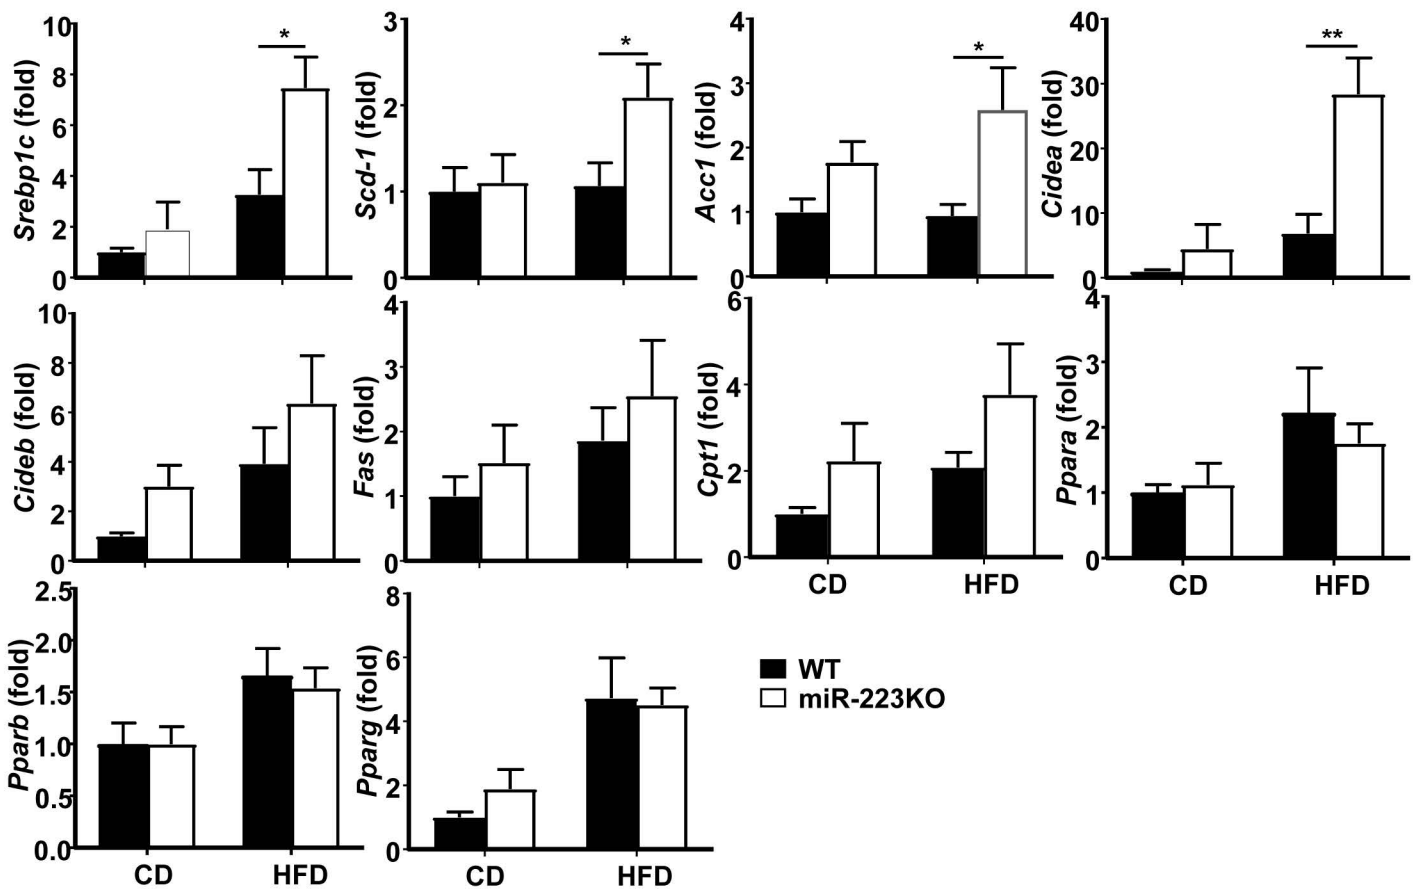

**F**

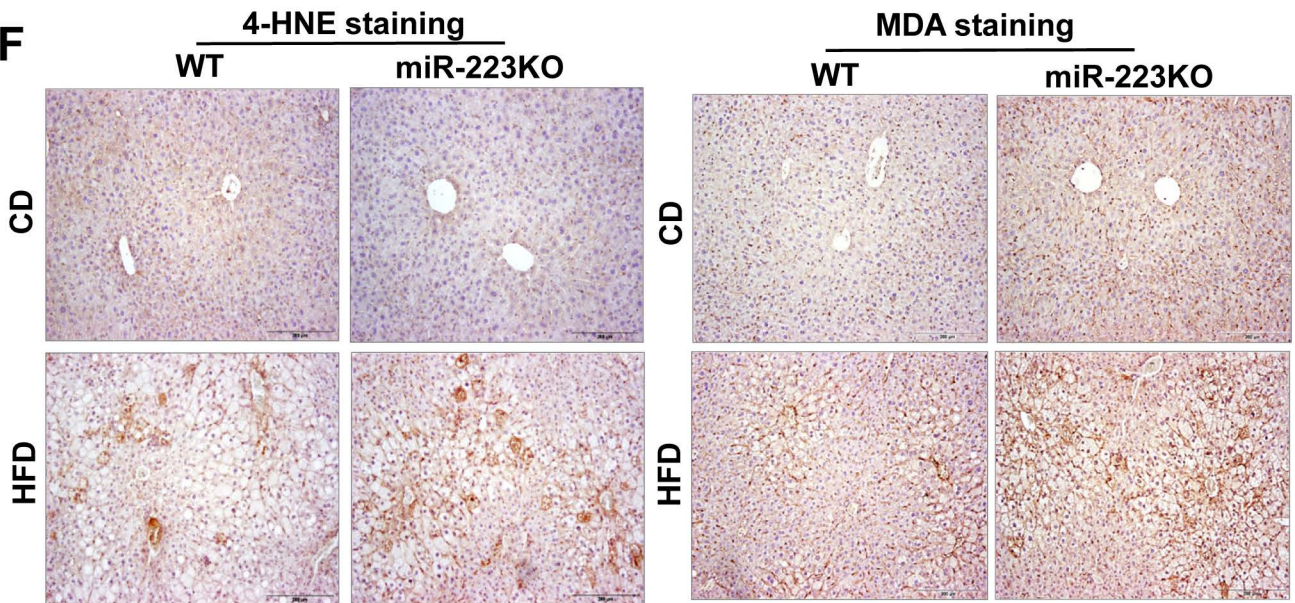

**Supporting Fig. S3. miR-223KO mice are more susceptible to HFD-induced inflammation and ROS production compared with WT mice.** WT and miR-223KO mice were fed a HFD or CD for 3 months. Liver tissue samples were collected. (A, B) Representative immunostaining of MPO and F4/80. Arrows indicate MPO<sup>+</sup> cells. (C) Percentage and number of circulating neutrophils. (D) Representative of CD3 and CD19 staining of liver tissue sections were shown. Quantification of CD3<sup>+</sup> and CD19<sup>+</sup> cells per field was quantified. Arrows indicate CD3<sup>+</sup> cells (E) RT-qPCR analyses of several steatogenesis genes. (F) Representative 4-hydroxynonenal (HNE) and malonaldehyde (MDA) staining of liver tissue sections were shown. Values represent means  $\pm$  SEM (n=5-10). \*\**P*< 0.01 in comparison with WT HFD group; ###*P*<0.001 in comparison with WT CD group.

**A**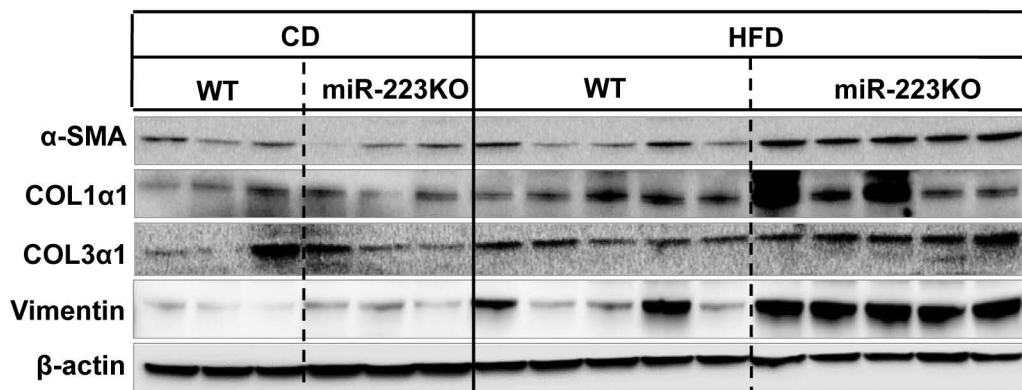**B**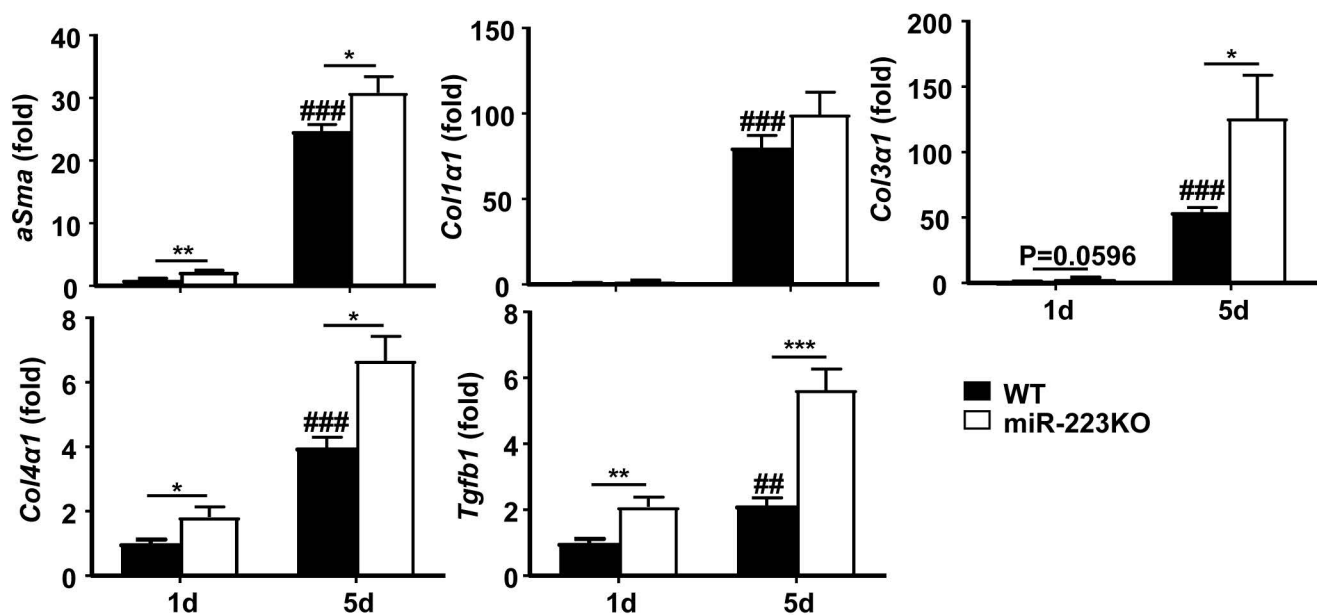**C**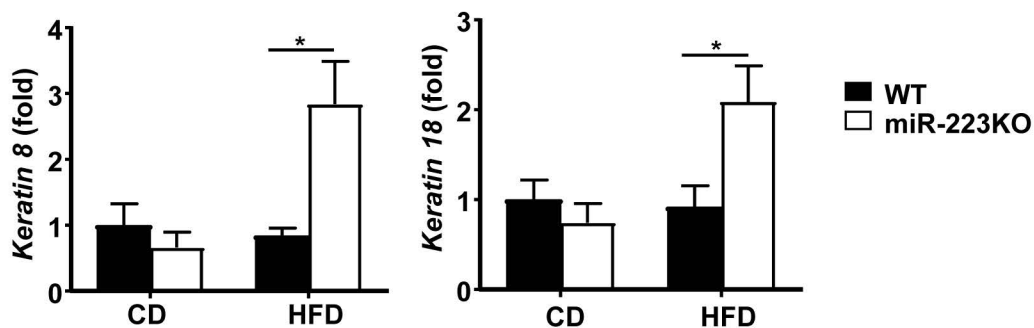

**Supporting Fig. S4. HFD feeding for 3 months upregulates fibrogenic proteins and Mallory-Denk bodies-associated genes in miR-223KO mice.** (A) WT and miR-223KO mice were fed a HFD or CD for 3 months. Liver tissue samples were collected. Western blotting analyses of fibrogenic genes.

(B) Hepatic stellate cells were isolated from WT and miR-223KO mice (without HFD feeding), and cultured for 1d or 5d, followed by RT-qPCR analyses of fibrogenic genes. (C) The samples from Panel A were subjected to RT-qPCR analyses of hepatic *Keratin 8* and *Keratin 18*. Values represent means  $\pm$  SEM (n=5-10). \* $P$ < 0.05, \*\*\* $P$ <0.001 in comparison with WT HFD groups. ## $P$ < 0.01, ### $P$ <0.001 in comparison with WT CD groups.

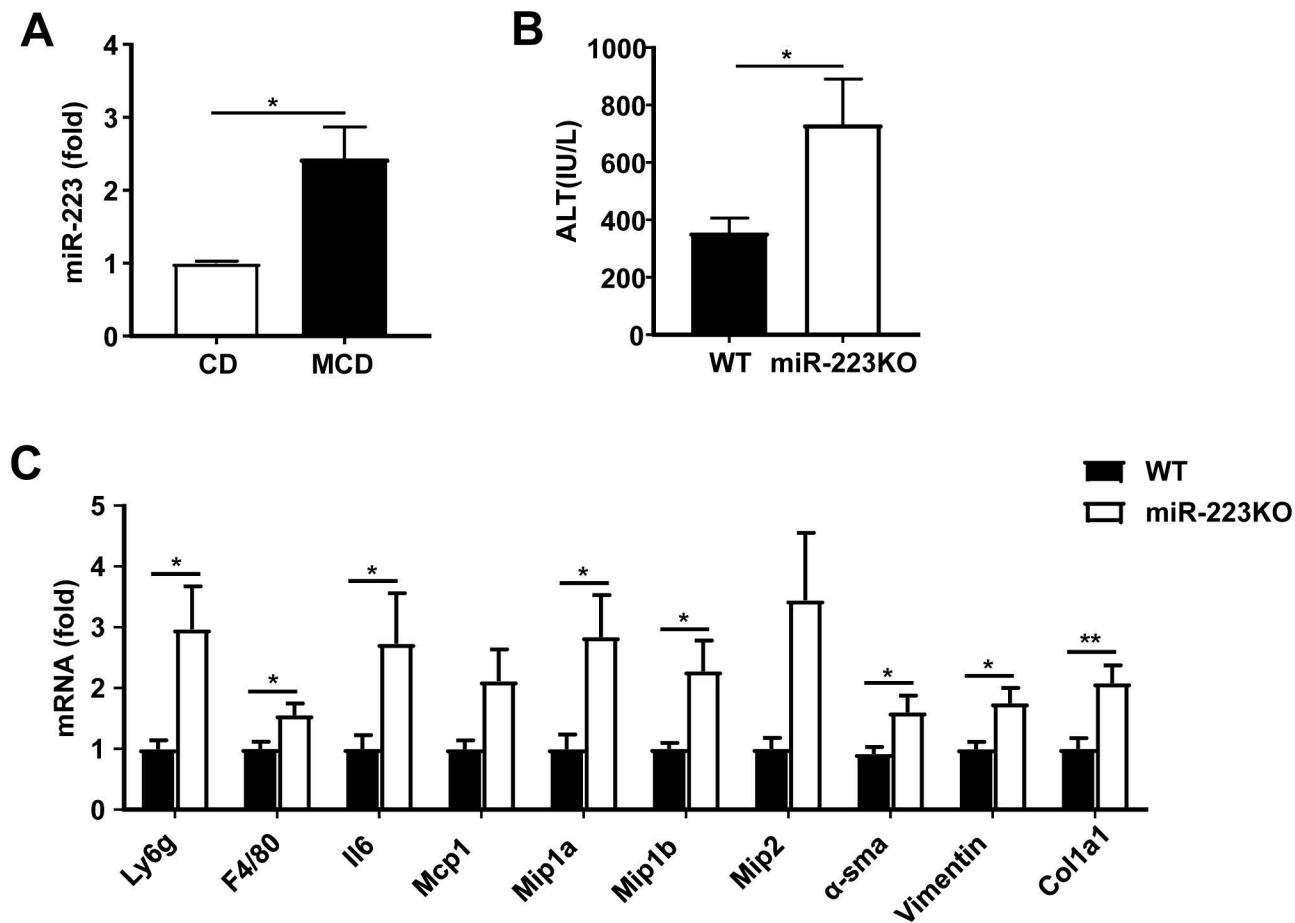

**Supporting Fig. S5. miR-223KO mice are more susceptible to MCD-induced NASH.** WT and miR-223KO mice were fed a MCD or the MCD control diet (CD) for 4 weeks. Serum and liver tissue samples were collected. (A) RT-qPCR analyses of liver miR-223 levels. (B) Serum ALT levels. (C) RT-qPCR analyses of hepatic inflammatory and fibrogenesis genes. Values represent means  $\pm$  SEM (n=6-10). \* $P$  < 0.05, \*\* $P$  < 0.01 as indicated.

**A**

| Top Diseases and Bio Functions      |            |
|-------------------------------------|------------|
| Diseases and Disorders              | #Molecules |
| Cancer                              | 390        |
| Organismal Injury and Abnormalities | 397        |
| Inflammatory Response               | 57         |

**B**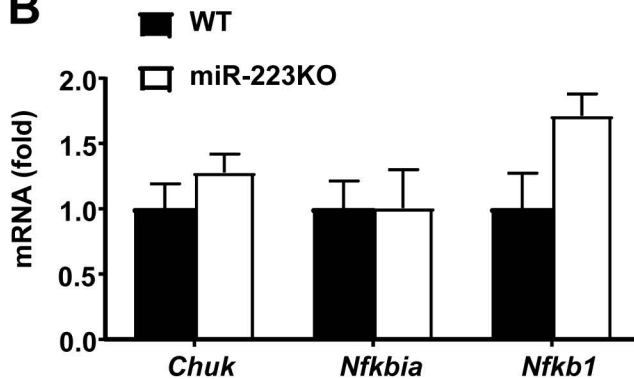**C**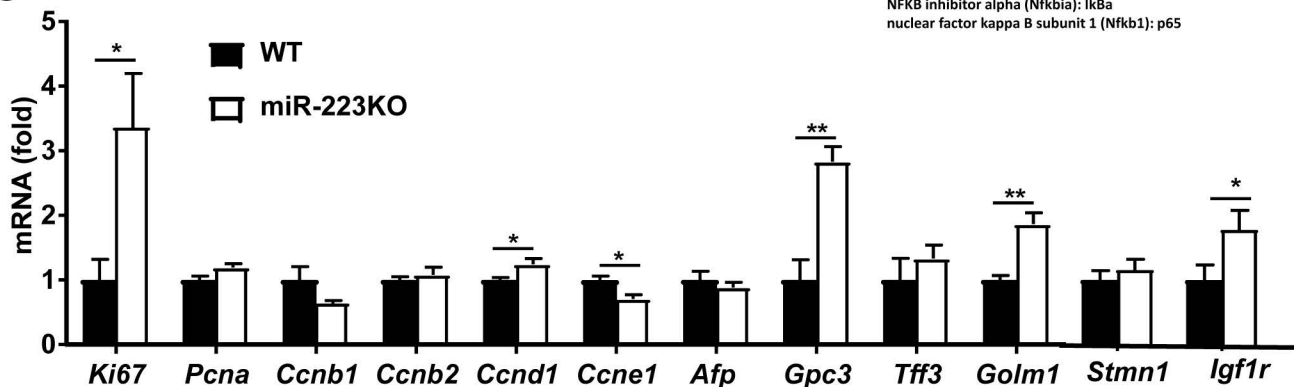

Chuk (conserved helix-loop-helix ubiquitous kinase): IKKa  
 NFKB inhibitor alpha (Nfkbia): IkbBa  
 nuclear factor kappa B subunit 1 (Nfkb1): p65

**D**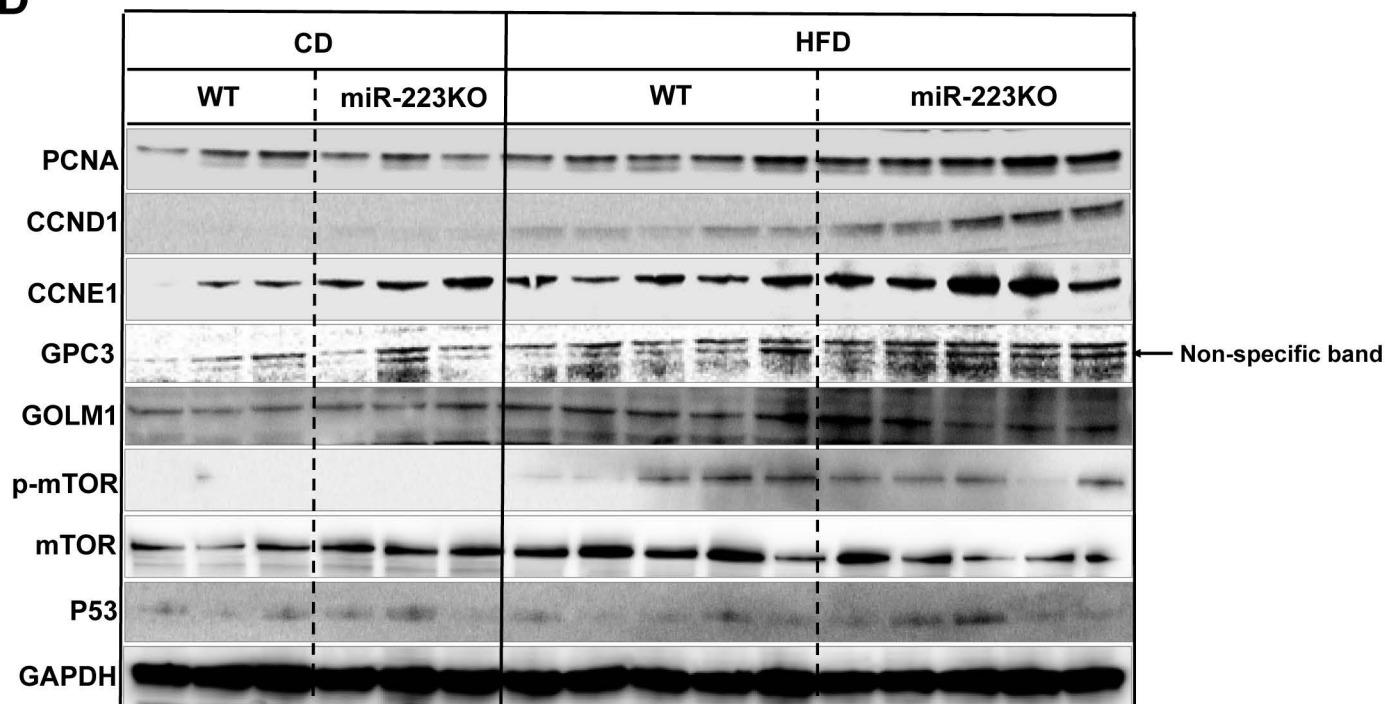

**Supporting Fig. S6. The expression of hyperproliferation-related genes are dysregulated in miR-223KO mice after HFD feeding for 3 months.** WT and miR-223KO mice were fed a HFD or CD for 3 months. Liver tissue samples were collected, and then subjected to microarray analysis. (A) Ingenuity pathway analyses (IPA) of top diseases/bio-functions in WT and miR-223KO mice after 3m-HFD feeding. (B, C) Hepatic, NF- $\kappa$ B-related genes, proliferation markers and HCC markers were measured by microarray analysis. (D) Hepatic proliferation and HCC markers were detected by western blotting. Values represent means  $\pm$  SEM. \* $P$  < 0.05, \*\* $P$  < 0.01 in comparison with WT HFD group.

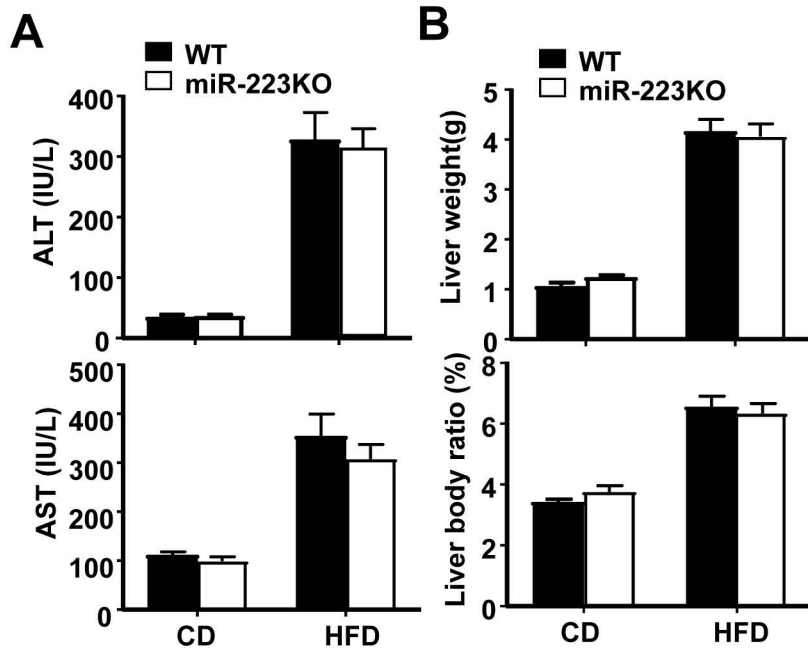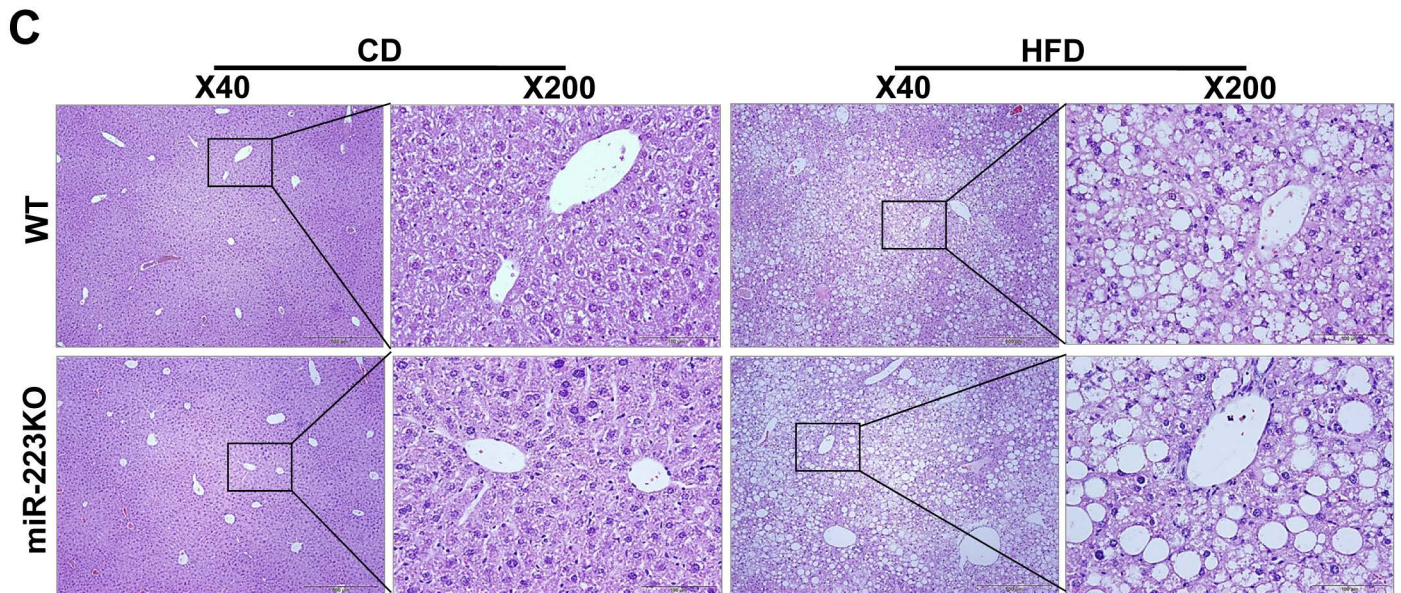

**Supporting Fig. S7. miR-223KO mice show similar levels of ALT and steatosis compared with WT mice after HFD feeding for one year.** WT and miR-223KO mice were fed a HFD or CD for one year. Liver tissue samples were collected. (A) The levels of ALT and AST were measured. (B) Liver weight and liver body ratio were measured. (C) Representative images of H&E staining of liver tissue sections were shown. Values represent means  $\pm$  SEM (n=6-21).

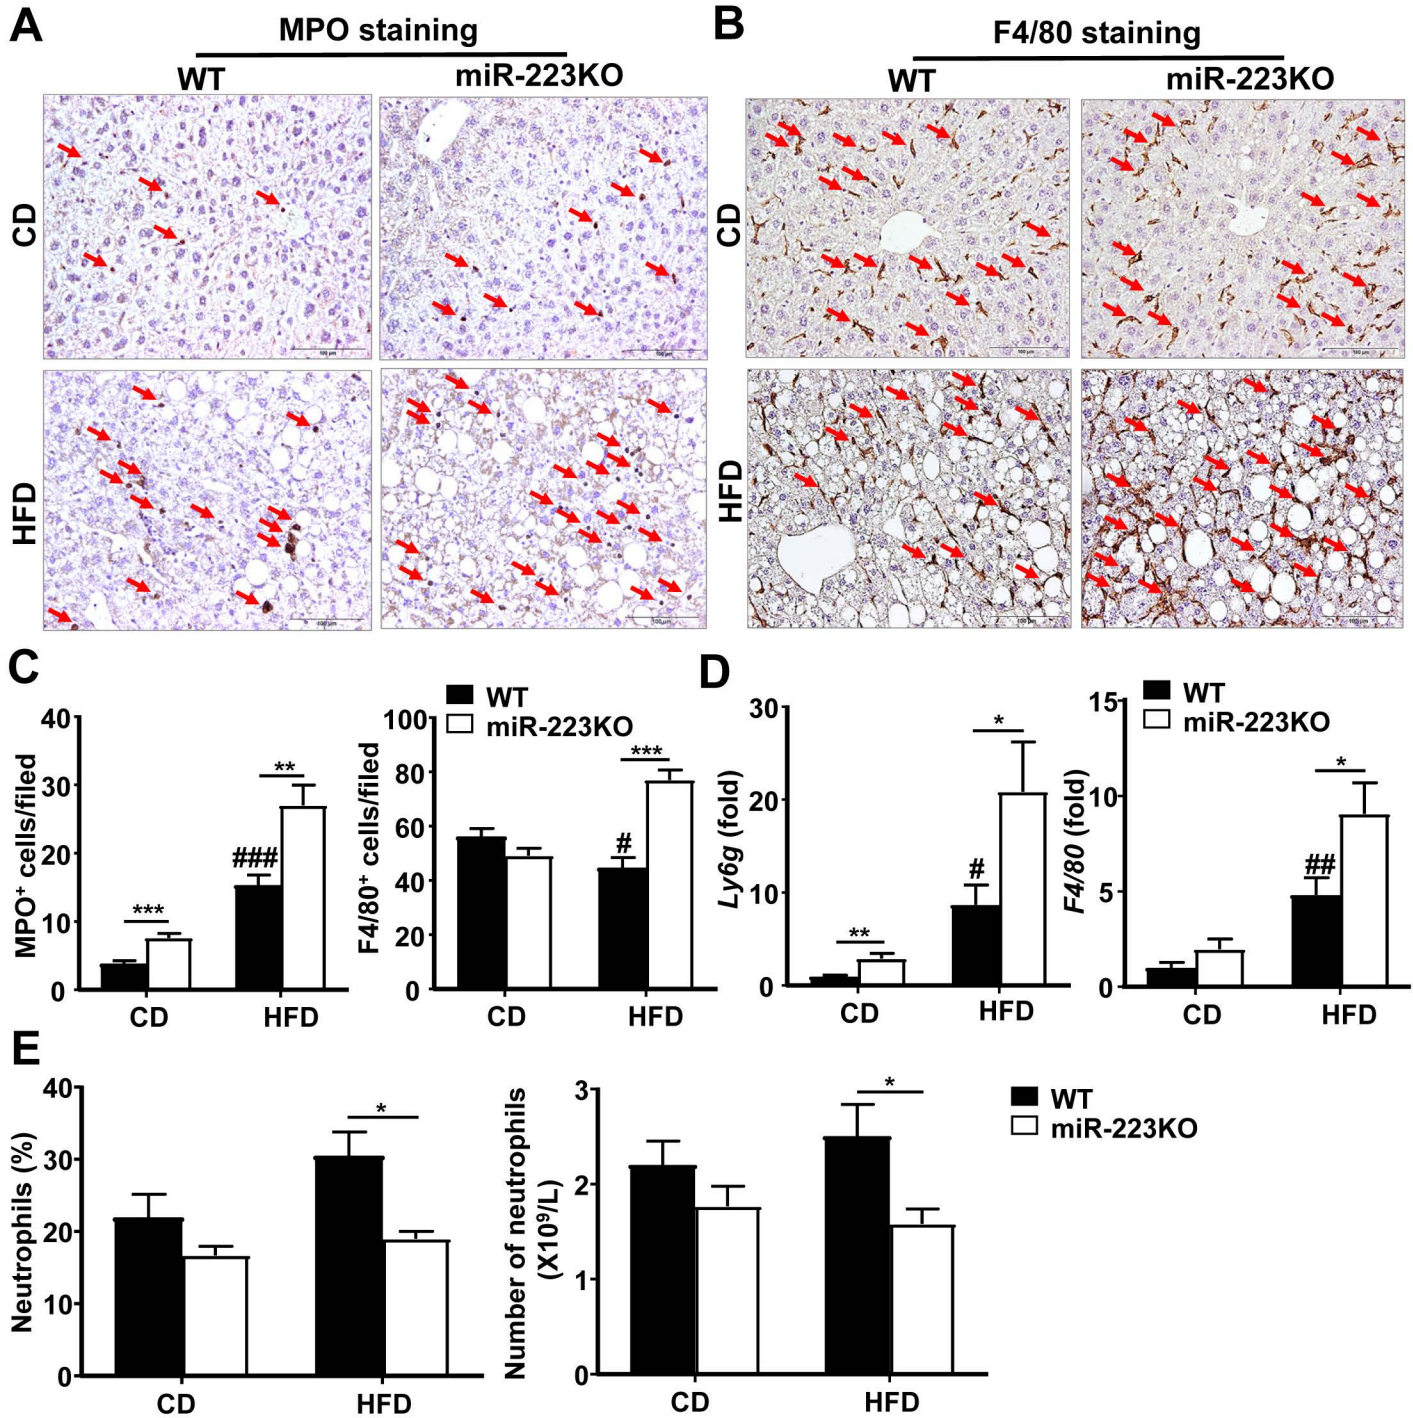

**Supporting Fig. S8. miR-223KO mice show greater degree of liver neutrophil and macrophage infiltration, and increased inflammatory response after one-year HFD feeding.**

WT and miR-223KO mice were fed a HFD or CD for one year. Liver tissue samples were collected. (A, B) Representative MPO and F4/80 staining of liver tissue sections were shown. Arrows indicate MPO<sup>+</sup> and F4/80<sup>+</sup> cells. (C) MPO<sup>+</sup> cells and F4/80<sup>+</sup> cells per field were quantified. (D) RT-qPCR analyses of liver *Ly6G* and *F4/80* mRNA. (E) The percentage and number of circulating neutrophils were determined by hematology analyser. Values represent means ± SEM (n=6-21). \**P* < 0.05, \*\**P* < 0.01, \*\*\**P* < 0.001 in comparison with WT HFD groups; #*P* < 0.05, ##*P* < 0.01, ###*P* < 0.001 in comparison with WT CD groups.

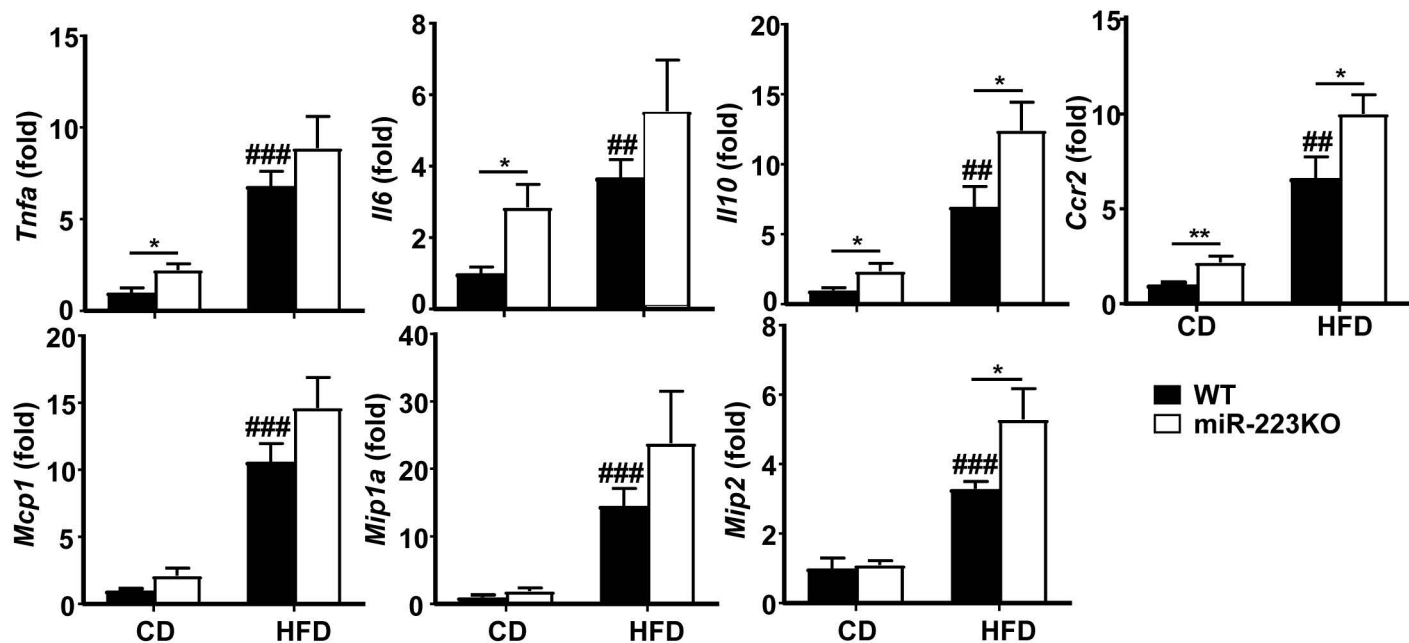

**Supporting Fig. S9. miR-223KO mice show greater inflammatory response than WT mice after one-year HFD feeding.** WT and miR-223KO mice were fed a HFD or CD for one year. Liver tissue samples were collected. RT-qPCR analyses of several cytokine and chemokine genes. Values represent means  $\pm$  SEM (n=6-21). \* $P$ < 0.05, \*\* $P$ < 0.01 in comparison with WT STD or HFD group; # $P$ <0.01, ### $P$ <0.001 in comparison with WT CD group.



## Supporting Fig. S10

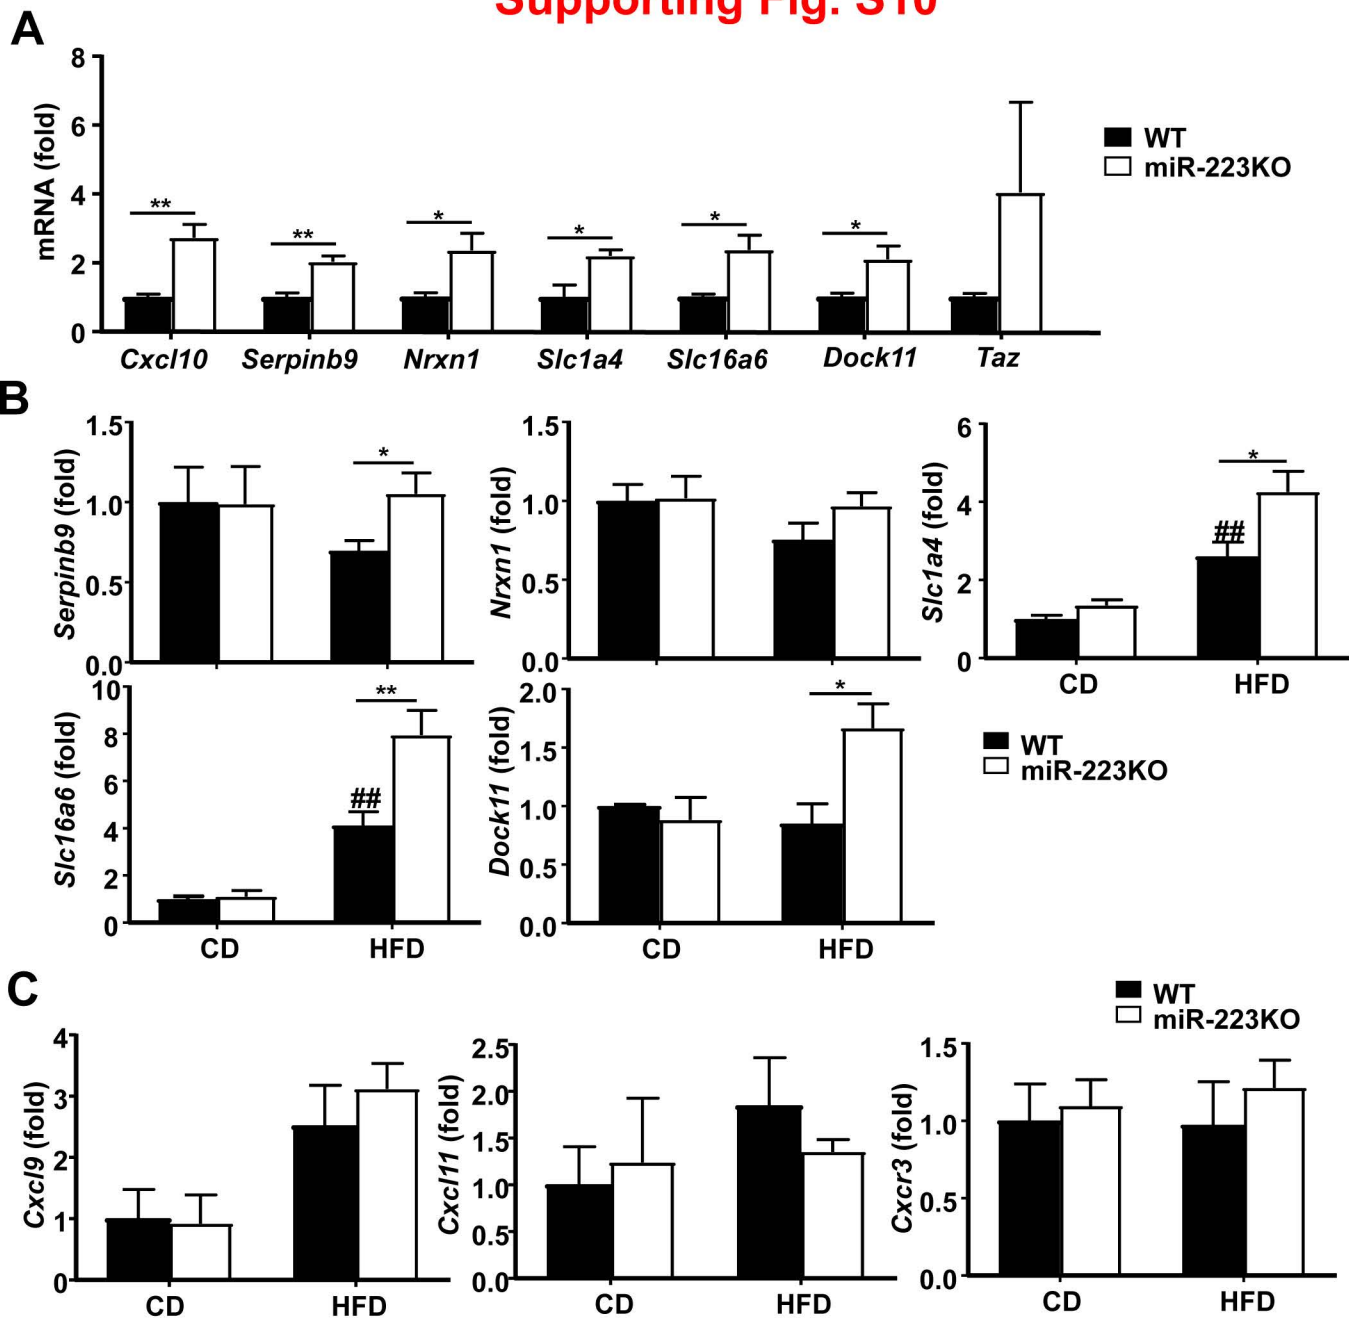

**Supporting Fig. S10. The levels of potential miR-223 target genes in WT and miR-223KO mice after 3m-HFD feeding.** (A, B) The levels of potential miR-223 target genes were obtained from our microarray data (panel A) and confirmed by RT-qPCR (panel B). (C) RT-qPCR analyses of *Cxcl9*, *Cxcl11* and *Cxcr3*. Values represent means  $\pm$  SEM ( $n=5-10$ ). \* $P < 0.05$ , \*\* $P < 0.01$  in comparison with WT HFD group; ## $P < 0.01$  in comparison with WT CD group.

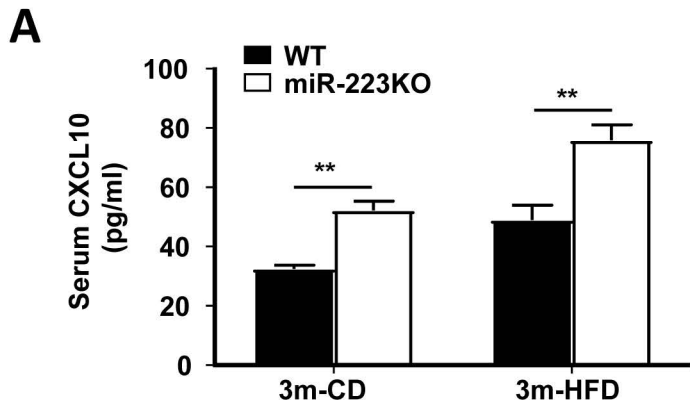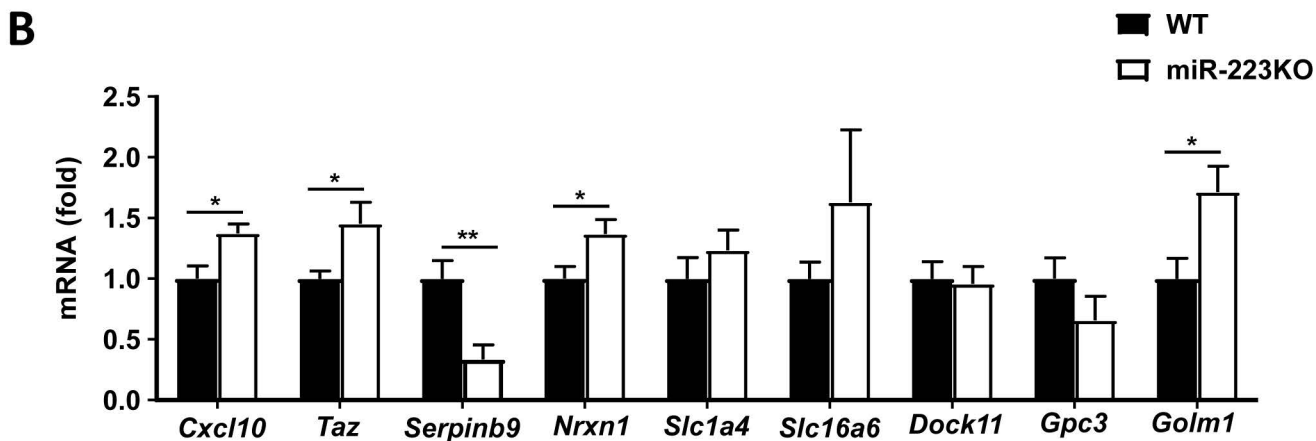

**Supporting Fig. S11. (A) miR-223KO mice are associated with higher serum levels of CXCL10 than WT mice after 3m-HFD feeding.** WT and miR-223KO mice were fed a HFD or CD for three months. Serum levels of CXCL10 were measured. Values represent means  $\pm$  SEM (n=6-21). \*\* $P$ <0.01. **(B) miR-223KO mice are more susceptible to MCD-induced *Cxcl10* and *Taz* expression.** WT and miR-223KO mice were fed a MCD for 4 RT-qPCR analyses of potential miR-223 targeted genes. Values represent means  $\pm$  SEM (n=5-10). \* $P$ < 0.05, \*\* $P$ <0.01.

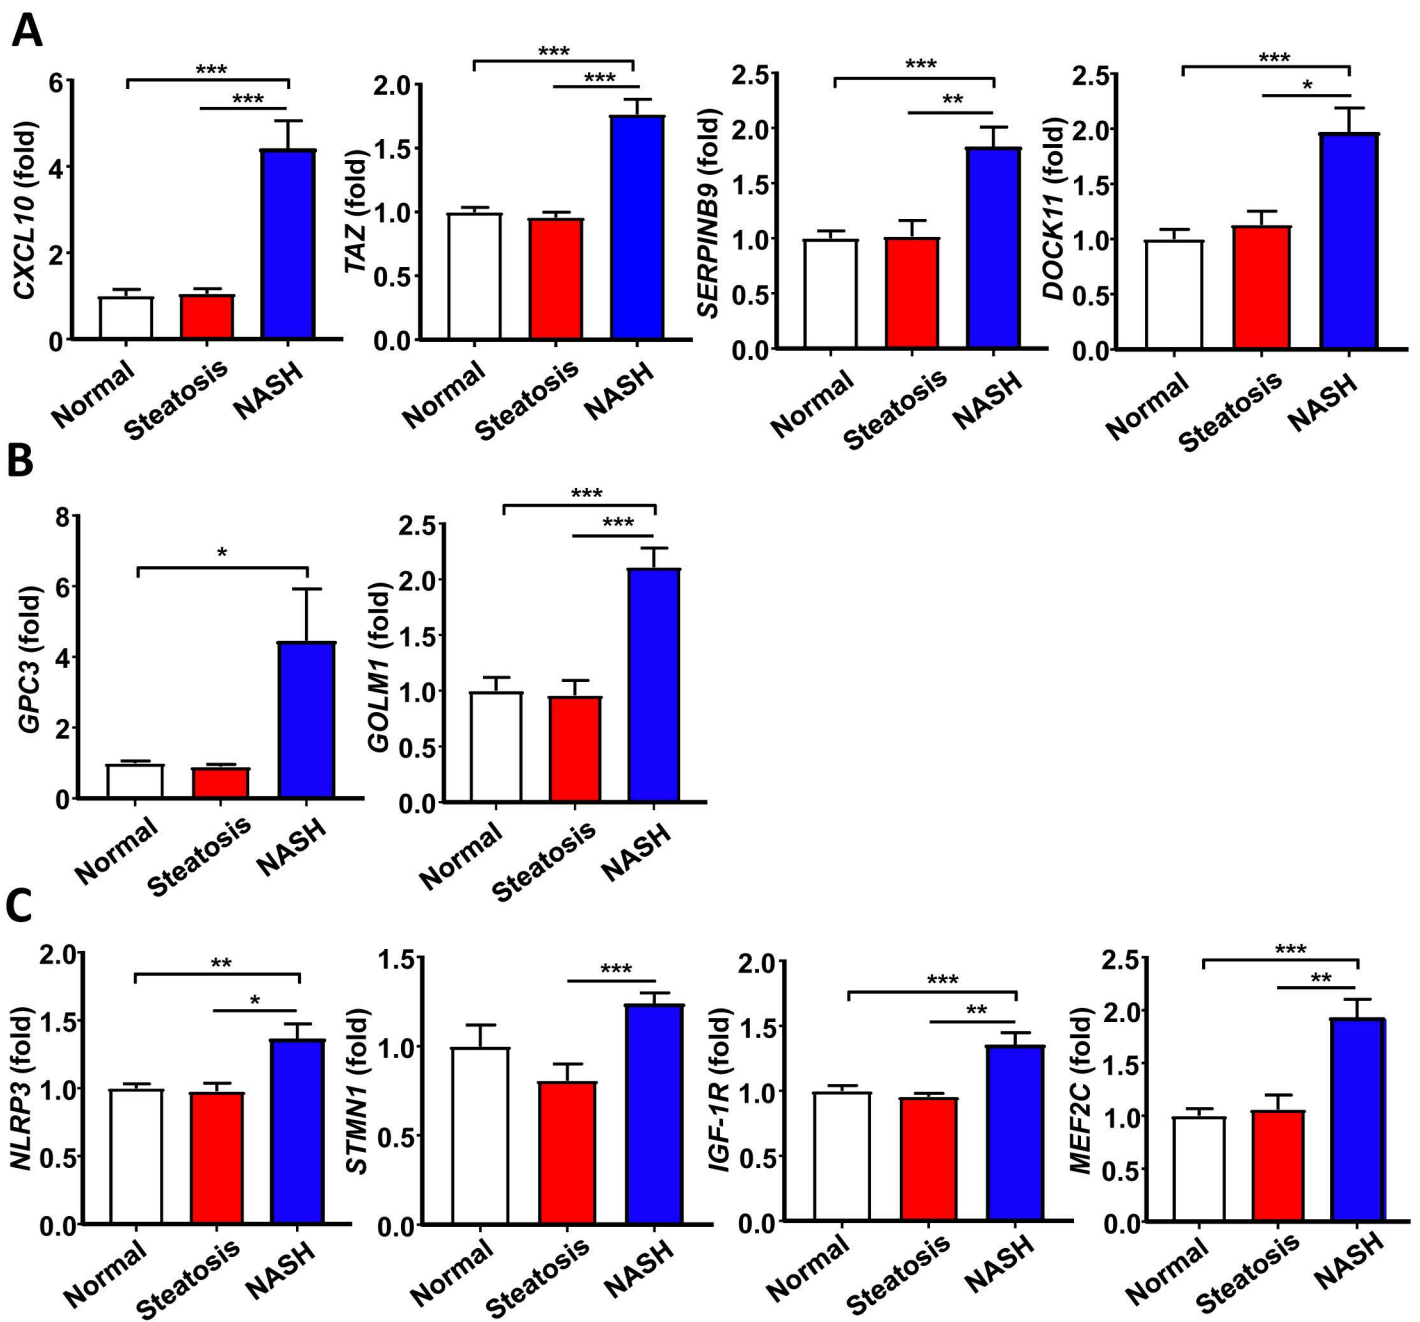

**Supporting Fig. S12. Several potential miR-223 targets of liver cancer-related genes are significantly upregulated in NASH patients.** The samples were diagnosed as normal (n=19), steatosis (n=10), NASH (n=16). (A) Several potential targets of miR-223 were measured by microarray analysis from published microarray data (the accession number [E-MEXP-3291](http://www.ncbi.nlm.nih.gov/geo/query/acc.cgi?acc=GSE10245) [<http://www.webcitation.org/5zyojNu7T>]). (B) Cancer-related genes were measured by microarray analysis. (C) Several proven miR-223 targeted genes were measured by microarray analysis. Values represent means  $\pm$  SEM. \* $P < 0.05$ , \*\* $P < 0.01$ , \*\*\* $P < 0.001$ .

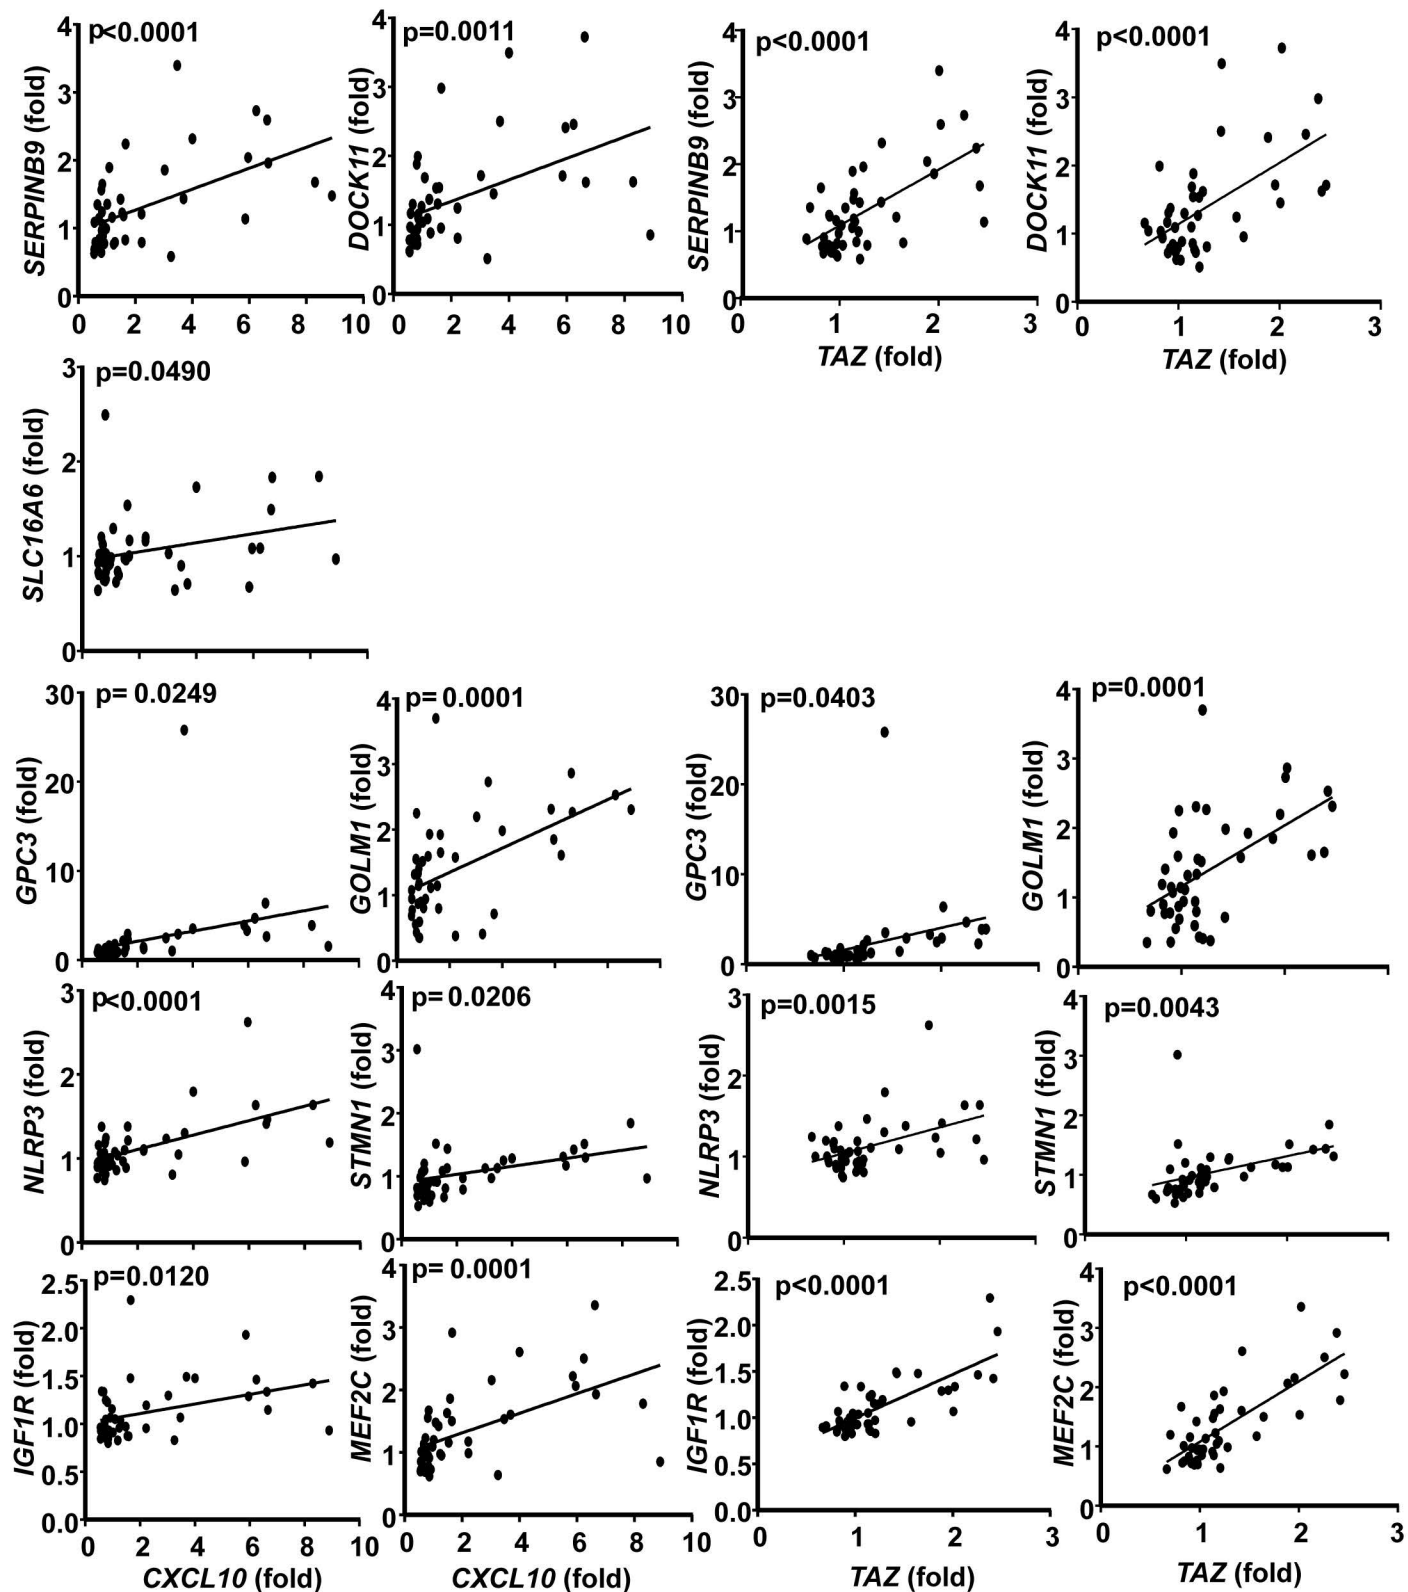

**Supporting Fig. S13. Several potential and proven miR-223 targeted genes positively correlate with *CXCL10* or *TAZ* expression in NASH patients.** Microarray analysis of normal (n=19), steatosis (n=10), NASH (n=16) was obtained from published microarray data (the accession number [E-MEXP-3291](http://www.webcitation.org/5zyoiNu7T) [<http://www.webcitation.org/5zyoiNu7T>]). Several potential and proven miR-223 targeted genes positively correlated with *CXCL10* or *TAZ* in NASH patients. P value is indicated.

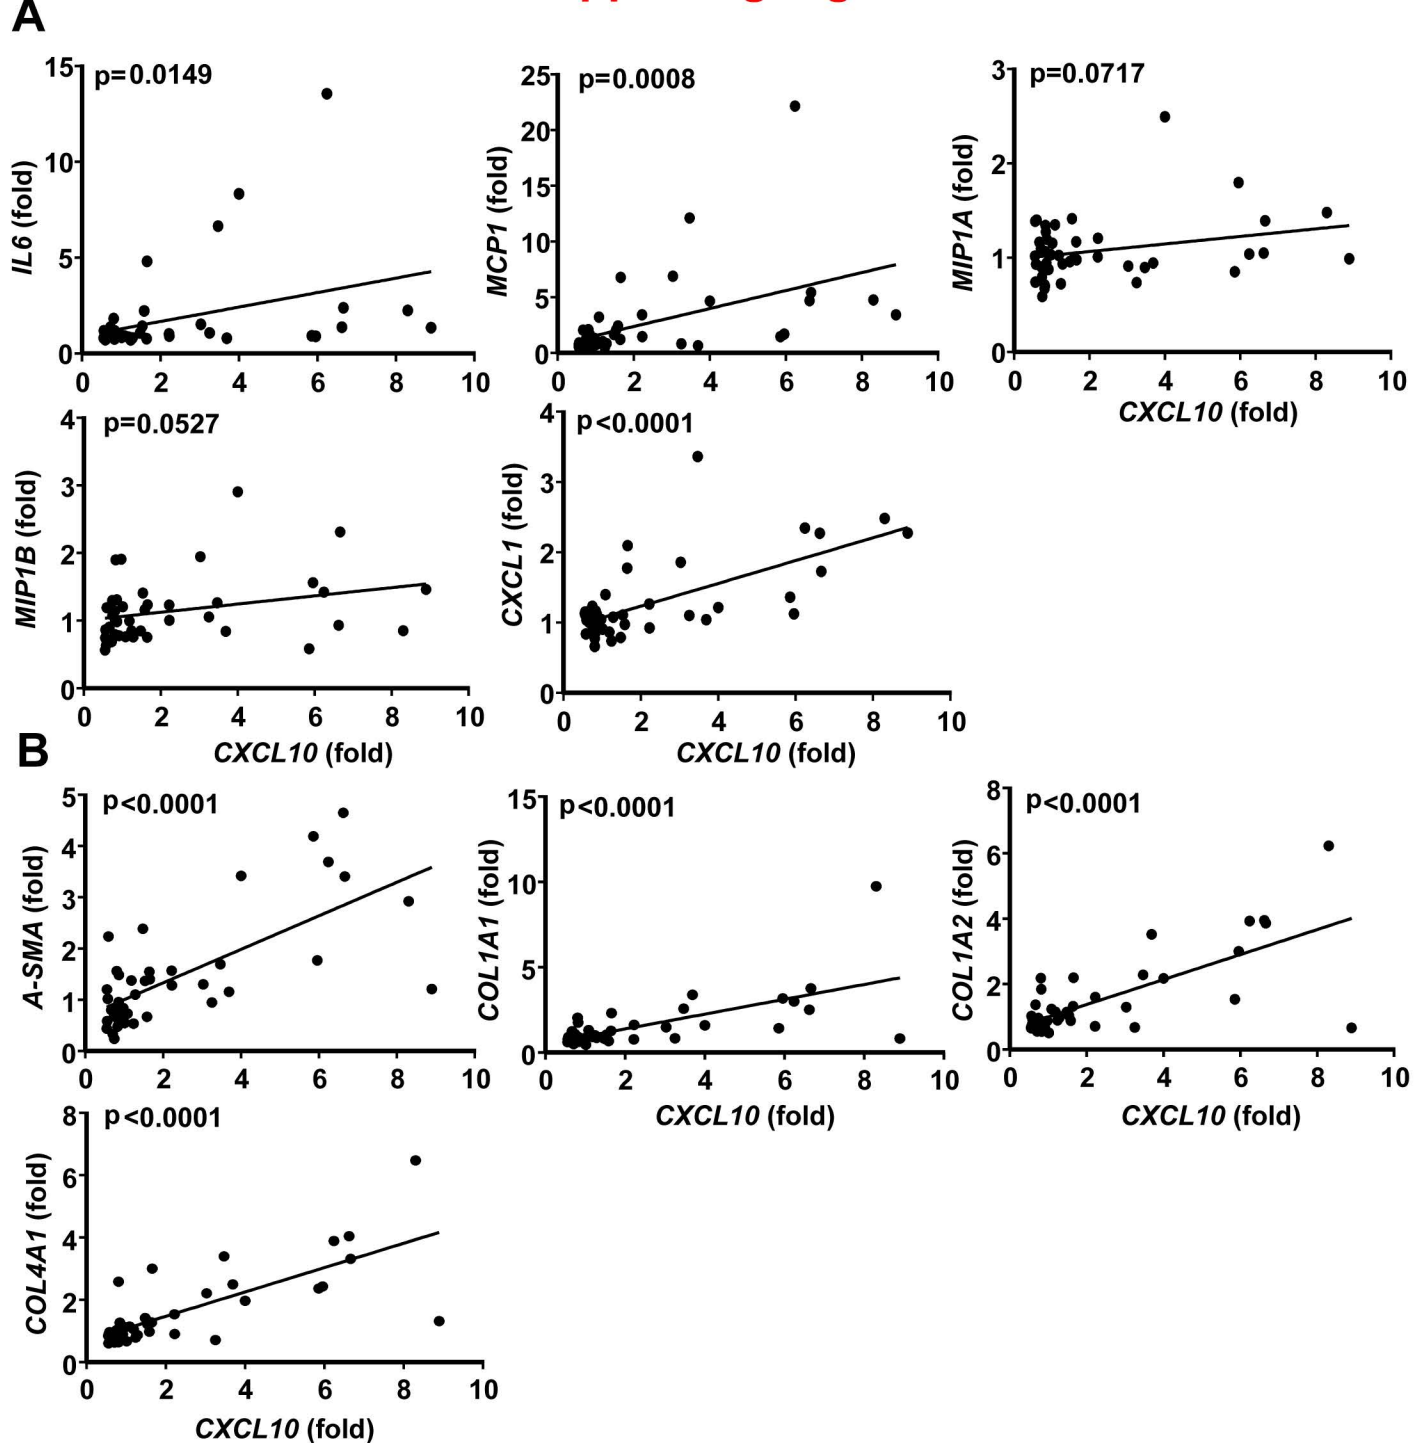

**Supporting Fig. S14. Several cytokine and chemokine genes and fibrogenesis genes positively correlate with *CXCL10* expression in NASH patients.** Microarray analysis of normal (n=19), steatosis (n=10), NASH (n=16) was obtained from published microarray data (the accession number [E-MEXP-3291](http://www.ncbi.nlm.nih.gov/geo/query/acc.cgi?acc=E-MEXP-3291) [<http://www.webcitation.org/5zyojNu7T>]). Several cytokine and chemokine genes and fibrogenic genes positively correlate with *CXCL10* in NASH patients. P value is indicated.

**A**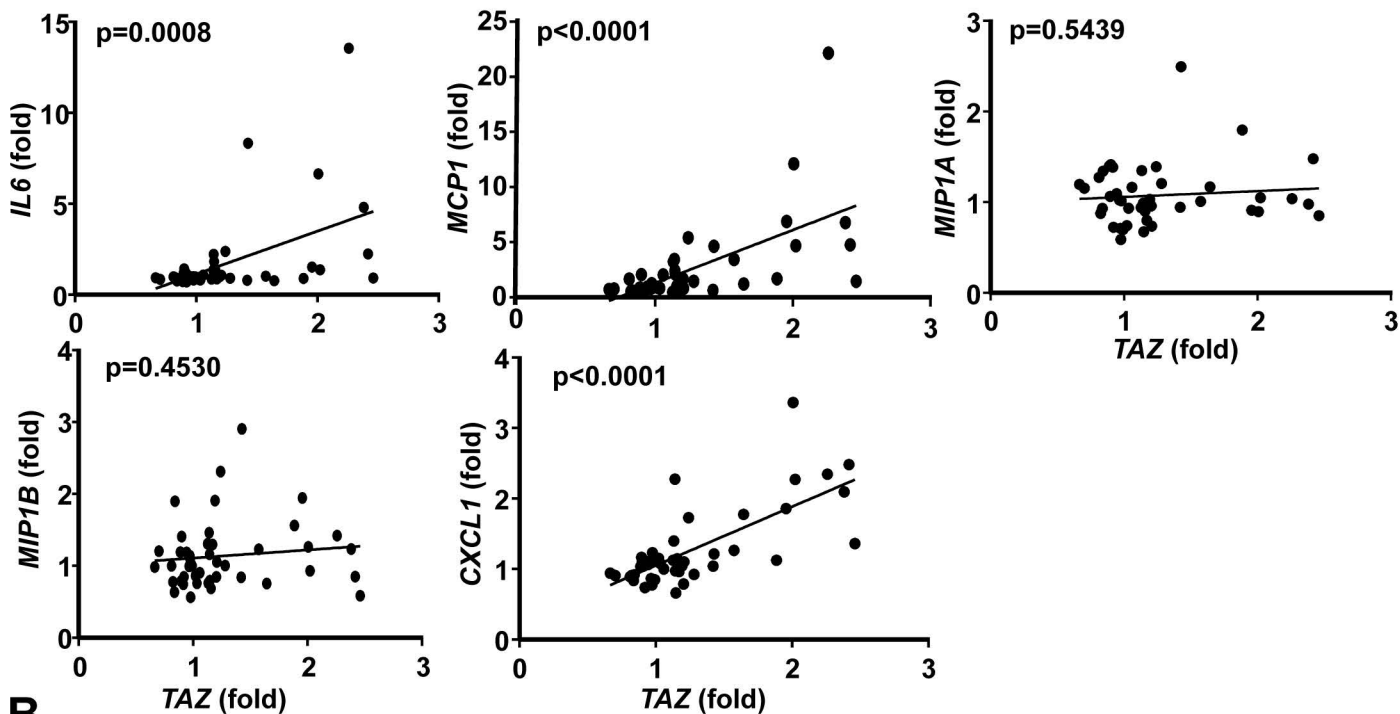**B**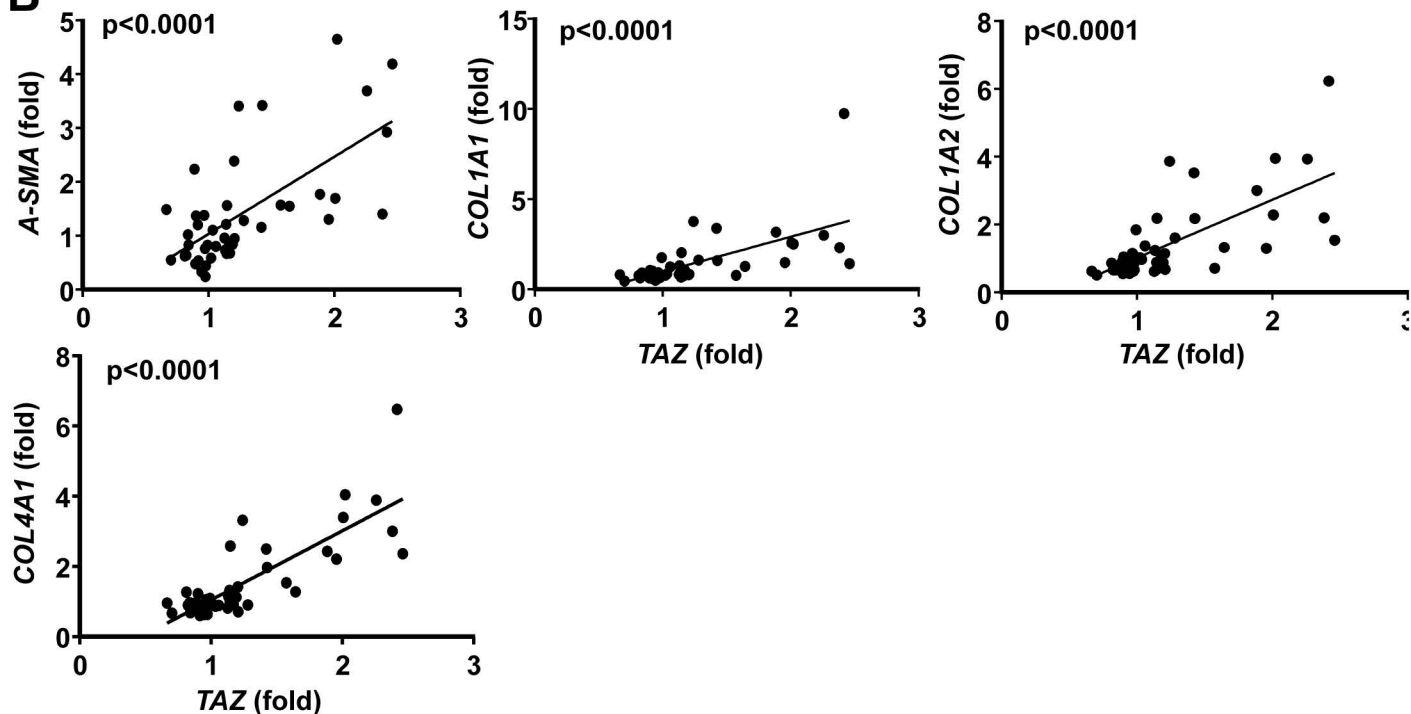

**Supporting Fig. S15. Several cytokine and chemokine genes and fibrogenesis genes positively correlate with TAZ expression in NASH patients.** Microarray analysis of normal (n=19), steatosis (n=10), NASH (n=16) was obtained from published microarray data (the accession number [E-MEXP-3291](http://www.webcitation.org/5zyojNu7T) [<http://www.webcitation.org/5zyojNu7T>]). Several cytokine and chemokine genes and fibrogenic genes positively correlate with TAZ in NASH patients. P value is indicated.
